# Learning Fast and Slow: Increased cortical plasticity leads to memory interference and enhanced hippocampal-cortical interactions

**Authors:** Irene Navarro-Lobato<sup>1\*</sup>, Adrian Aleman-Zapata<sup>1</sup>, Anumita Samanta<sup>1</sup>, Milan Bogers<sup>1</sup>, Shekhar Narayanan<sup>1</sup>, Abdelrahman Rayan<sup>1</sup>, Alejandra Alonso<sup>1</sup>, Jacqueline van der Meij<sup>1</sup>, Mehdi Khamassi<sup>2</sup>, Zafar Khan<sup>3</sup>, Lisa Genzel<sup>1\*</sup>

## Affiliations:

<sup>1</sup>Donders Institute for Brain, Cognition and Behaviour, Radboud University, Postbus 9010 6500GL Nijmegen

<sup>2</sup>Institute of Intelligent Systems and Robotics, CNRS, Sorbonne Université, F-75005 Paris, France.

<sup>3</sup>Laboratory of Neurobiology, CIMES, University of Malaga, Campus Teatinos s/n, Malaga 29010, Spain

\*Corresponding author. [Lisa.Genzel@donders.ru.nl](mailto:Lisa.Genzel@donders.ru.nl), [ire\\_nl@hotmail.com](mailto:ire_nl@hotmail.com)

## Summary

Our brain is continuously challenged by daily experiences. Thus, how to avoid systematic erasing of previously encoded memories? While it has been proposed that a dual-learning system with “slow” learning in the cortex and “fast” learning in the hippocampus could protect previous knowledge from interference, this has never been observed in the living organism. Here, we report that increasing plasticity via the viral-induced overexpression of RGS14414 in the prelimbic cortex leads to better one-trial memory, but that this comes at the price of increased interference in semantic-like memory. Indeed, electrophysiological recordings showed that this manipulation also resulted in shorter NonREM-sleep bouts, smaller delta-waves and decreased neuronal firing rates. In contrast, hippocampal-cortical interactions in form of theta coherence during wake and REM-sleep as well as oscillatory coupling during NonREM-sleep were enhanced. Thus, we provide the first experimental evidence for the long-standing and unproven fundamental idea that high thresholds for plasticity in the cortex protects preexisting memories and modulating these thresholds affects both memory encoding and consolidation mechanisms.

## 33 Introduction

34 Since patient H.M.<sup>1</sup> we know that memories are supported in the brain by a dual-  
35 learning system, but why this is the case remains unclear. Initially memories are stored  
36 in the hippocampus via synaptic changes in this more plastic brain area, known as the  
37 “fast learner”<sup>2</sup>. Later during sleep these hippocampal representations support  
38 reactivations of recent memories in the neocortex, the “slow learner” in the brain.  
39 Neocortical synapses are less plastic and therefore are thought to change only a little on  
40 each reinstatement. Therefore, remote memory is based on over time accumulated  
41 neocortical changes. Computational models testing why we have a dual-learning system  
42 have proposed that the neocortex learns slowly to discover the structure in ensembles of  
43 experiences<sup>2-4</sup>. Further, the hippocampus would then still permit rapid learning of new  
44 items without disrupting this structure and therefore the dual system would protect our  
45 memories from interference, when new memories would overwrite existing ones without  
46 the dual system. Although these theories provides remarkable insights about learning and  
47 knowledge extraction, they remains computational models with – until now – no direct  
48 experimental support, due to the lack of a valid behavioral paradigms that enable  
49 examining structured knowledge extraction in rodents as well interference effects.

50 To test if naturally restricted plasticity in the neocortex protects from memory  
51 interference, we artificially increased plasticity in the prelimbic cortex via the  
52 overexpression of an established plasticity-enhancer called regulator of G protein  
53 signaling 14 of 414 amino acids (RGS14414)<sup>5,6</sup>. The overexpression of RGS14414 is  
54 known to lead to increased BDNF and dendritic branching in the targeted area<sup>5,6</sup> and  
55 thereby increase plasticity locally. This increased local plasticity makes memories, that  
56 usually would not be retained, last longer and can rescue memory-deficits accompanying  
57 aging or diseases<sup>7-9</sup>. However, until now, the prefrontal cortex had not been targeted and  
58 it remained unknown how increasing plasticity would affect previously acquired  
59 knowledge. We combined this plasticity manipulation in the prefrontal cortex with a novel  
60 behavioral task – the Object Space task<sup>10</sup> – that allows the testing of semantic-like as  
61 well as simple memories in rodents.

62 We show that increased cortical plasticity leads to better one-trial memory  
63 performance. However, we observed that such enhanced fast learning is associated with  
64 impaired semantic-like, cumulative memories. In alignment with these findings,  
65 pharmacological experiments confirmed that these results were an outcome of local  
66 plastic changes in the prelimbic cortex. Next, we assessed the learning rate by devising  
67 a computational model and this model revealed that an increased learning rate in the  
68 intervention group augmented the influence of recent in contrast to remote memories on  
69 behavior. Finally, electrophysiological experiments showed that increased plasticity leads  
70 to 1) less NonREM sleep and smaller delta waves, 2) more neurons with slower firing  
71 rates, 3) increased hippocampal-cortical connectivity measured in theta-coherence,  
72 delta-spindle-ripple coupling and increased granger causality during ripple events and 4)  
73 off-target changes in hippocampal ripples.

74

## Results

### *Increasing cortical plasticity leads to more memory interference*

Prelimbic plasticity was increased by the overexpression of RGS14<sup>5-9</sup> (Fig. 1A, B) and initially two behavioral experiments were performed using the Object Space task<sup>10</sup>. In this task the condition Overlapping tests for the extraction of an underlying structure across five training trials, while the Stable condition tests for the simple memory of the last experience (Fig. 1C). In both experiments, we examined the effect of an interference trial 24h after initial training, with object configurations violating previously trained rules, on a test trial 48h later (Fig. 1D). The design was such that in the Overlapping condition remembering the training resulted in positive discrimination indices at test, in contrast the interference would lead to 0 or negative values. In the control condition Stable remembering both the training or the interference would result in positive discrimination indices.

At the test trial conducted after interference, RGS14-overexpressing animals exhibited higher discrimination indices in the Stable condition (Fig. 1D,  $p < 0.05$ ) but lower in the Overlapping condition ( $p < 0.01$ ) in comparison to controls. The results in the Overlapping condition emphasize that in controls cumulative memory expression was protected from interference, but after increasing plasticity in the cortex interference effects were observed. Further, the simple memory in the Stable condition did not last until test in controls, however after increasing plasticity the memory lasted longer.

To show that these effects were a result of the interference, we conducted three control experiments. Firstly, we performed a behavioral control, in which animals did not experience the interference trial. Secondly, we performed a pharmacological control, in which animals did experience the interference, but any subsequent plasticity-related changes were inhibited in the cortex via the infusion of anisomycin, a protein synthesis inhibitor. In these experiments RGS14-overexpressing animals showed discrimination indices comparable to controls emphasizing the determinant role of the interference trial in producing opposite outcomes. Thirdly, we added an additional control, in which animals did not receive pretraining on the Object Space Task conditions, but instead were only exposed to an object configuration for one-trial. When tested 48h later, increased cortical plasticity led to an enhanced one-shot memory performance (Fig. 1E,  $p < 0.05$ ).

Together, the behavioral and pharmacological results show that increasing cortical plasticity with RGS14-overexpression caused larger interference effects in a semantic-like memory task. Increased interference in this case was due to better memory for one-trial experiences and local changes in the prelimbic cortex. Thus, our experimental results verify for the first time the hypothesis that lower cortical plasticity is critical to protect previous knowledge from interference effects.

113 *Memory interference is due to a higher learning rate*

114 To characterize the build-up of a memory trace and its expression in the Object  
115 Space Task, we previously developed <sup>10</sup> a computational model that progressively learns  
116 place–object associations and makes decisions about which proportion of time to spend  
117 exploring each object in order to minimize uncertainty about these place–object  
118 associations. The model employs two parameters: a learning rate  $\alpha$ , which determines  
119 the balance between recent and remote memories, and a parameter  $\beta$ , which determines  
120 the balance between neophilic (preference for more novel object location) and neophobic  
121 (aversion for more novel object location) exploratory behaviors. Here, we fitted our model  
122 on the behavioral data-set to find for each individual subject the values of the model  
123 parameter set  $\alpha$  and  $\beta$  that best fit the data. There was no difference in memory  
124 expression ( $\beta$ ). However, RGS14-overexpressing animals had systematically higher  
125 learning rate ( $\alpha$ ) values (Fig. 1F,  $p < 0.05$ ). This indicates that exploration behavior in  
126 RGS14-overexpressing animals was driven more by recent than remote memories in  
127 contrast to controls.

128 Thus, the modelling results show that increasing cortical plasticity with RGS14-  
129 overexpression caused larger interference effects in a semantic-like memory task due to  
130 a higher learning rate.

131

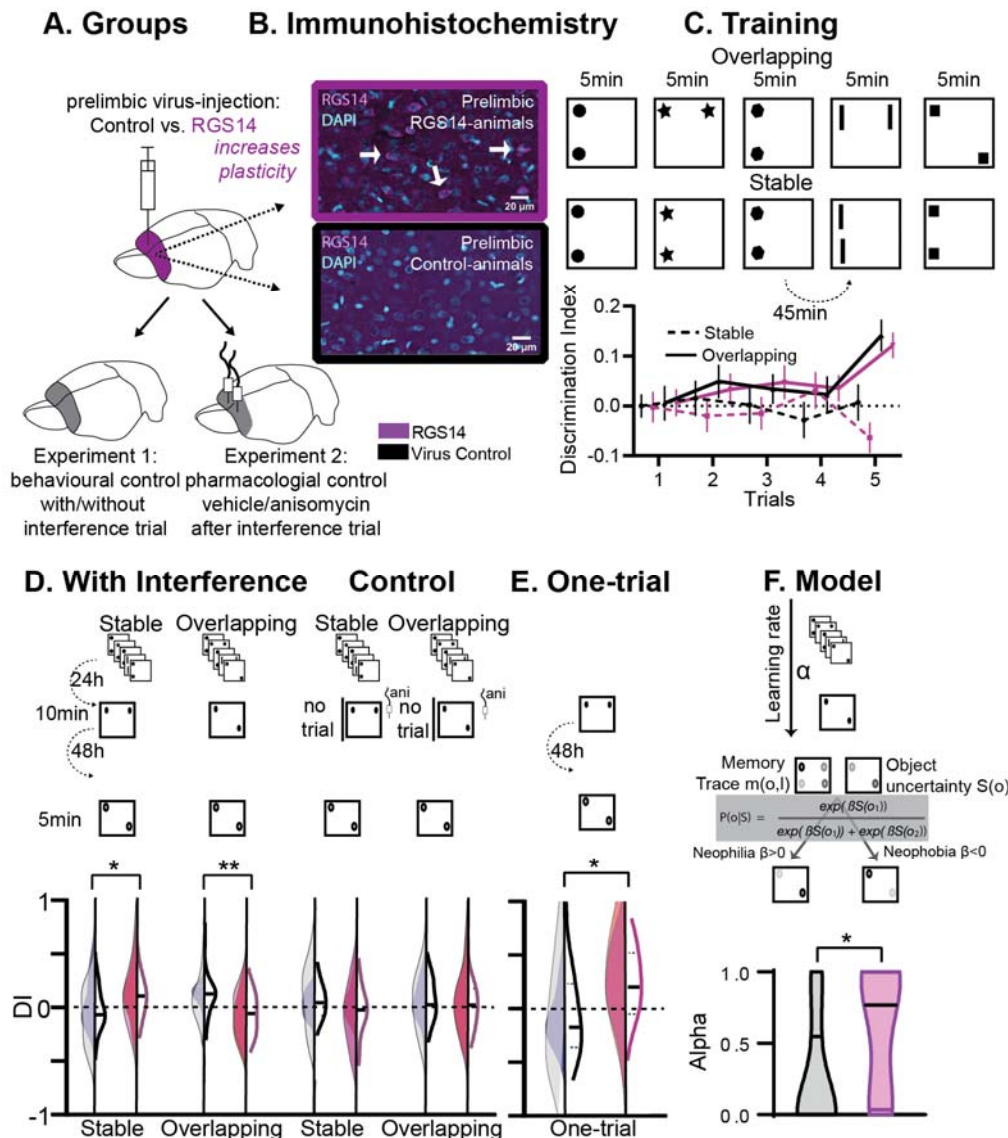

132 **Fig.1 Behavioral Experiments:** **A.** Half the animals were injected with a lentivirus for the overexpression of RGS14414  
 133 increasing plasticity in the prelimbic cortex, the other half had a control virus. These animals were included in either  
 134 Experiment 1 (behavioral control), or were implanted with canula to the prelimbic cortex for Experiment 2  
 135 (pharmacological controls, total n=65 with n=16-17 per experimental group). **B.** Immunohistochemistry for RGS14  
 136 expression in treated and control animals (purple, cyan DAPI staining). **C.** Object Space Task training contains five  
 137 trials with 45min inter-trial-intervals. In Overlapping one location always contains an object, while the other object moves  
 138 each trial. In Stable the configuration always remains the same. Discrimination Index (exploration time moved-not  
 139 moved/sum) over training trials show slowly rising discrimination in Overlapping and not Stable with preference for the  
 140 less often used locations especially in the 5<sup>th</sup> trial as expected<sup>10</sup> 9DI interference and exploration times see Fig. S1).  
 141 **D.** 24h after training animals had an interference trial (10min, different and same configuration as last training trial for  
 142 Stable and Overlapping respectively) followed by a test trial another 48h later (again different and same configuration  
 143 as interference trial for Stable and Overlapping respectively). In the controls (right side) for Experiment 1 there was no  
 144 interference and in Experiment 2 animals were infused with anisomycin after the interference trial. There was a  
 145 significant interaction where interference had the opposite effect in each condition according to virus manipulation  
 146 (rmANOVA with condition, interference/drug, experiment, virus; cond\*int/drug\*virus  $F_{1,61}=13.2$   $p<0.001$ ; stable with  
 147 interference  $t_{63}=2.1$   $p=0.039$ , overlapping with interference  $t_{63}=3.1$   $p=0.003$ , other  $p>0.12$ ). **E.** One-trial control followed  
 148 48h later by test, RGS14-overexpressing animals performed better than controls ( $t_{30}=2.2$   $p=0.037$ ). **F.** Model-fitting  
 149 show that RGS14-overexpressing animals have a higher learning rate  $\alpha$  (KS-D=0.46  $p=0.044$ ). Control grey, RGS-  
 150 overexpressing purple, lighter shades experiment 1, darker shades experiment 2, \* $p<0.05$ , \*\* $p<0.01$

151 *Increased cortical plasticity results in shorter NonREM bouts and smaller delta-waves*

152 Sleep is supposedly the price the brain pays for plasticity<sup>11,12</sup>. The idea is that during  
153 a waking episode, learning statistical regularities about the current environment requires  
154 strengthening connections throughout the brain. This increases cellular needs for energy  
155 and supplies, decreases signal-to-noise ratios, and saturates learning. Therefore,  
156 subsequently during sleep, previous waking activity would lead locally to larger delta-  
157 waves (1-4Hz) and spontaneous activity during these oscillations in NonREM sleep  
158 should renormalize net synaptic strength and restore cellular homeostasis<sup>13</sup>.

159 To test this, after viral-injection rats were implanted with hyperdrives containing 16  
160 tetrodes targeting the hippocampus and prelimbic cortex (Fig. 2). We recorded neural  
161 activity during training as well as sleep in the Object Space task (OS) and compared this  
162 to a home cage control (HC). Surprisingly, RGS14-overexpressing animals showed less  
163 NonREM sleep ( $p<0.05$ , Fig. 2C), which can be attributed to shorter bout lengths  
164 ( $p<0.0001$ , Fig. 2D). These animals also presented with smaller amplitude delta-waves  
165 ( $p<0.0001$ ). In controls, we did observe that delta-waves occurred more after learning  
166 (OS vs HC,  $p<0.0001$ , Fig. 2E) and that their amplitude ( $p<0.0001$ ) increased while their  
167 intrinsic frequency decreased (Fig. S3A). These homeostasis effects in amplitude and  
168 intrinsic frequency after learning were also seen in RGS14-overexpressing animals (both  
169  $p<0.0001$ ).

170 In sum, in controls we could confirm the proposition that learning and therefore  
171 plastic changes lead to a homeostatic response with increases in delta wave activity.  
172 However, we show that artificially increasing plasticity in the prelimbic cortex does not  
173 lead to an enhancement of this effect. Instead, we observed the opposite, where RGS14-  
174 overexpressing animals show less NonREM sleep and smaller delta waves.

175  
176 *More neurons with slower firing rates after plasticity-increase*

177 It has been previously proposed that slow-firing neurons are more plastic than fast-  
178 firing ones<sup>14</sup>. Thus, next, we focused on neuronal firing of individual neurons in the  
179 prelimbic cortex. We first determined the firing rate of each neuron during task  
180 performance and noticed that RGS14-overexpressing animals showed more neurons  
181 with low firing rates ( $p<0.0001$ , Fig. 2F). When splitting neurons in controls into pentiles  
182 according to their firing rate and applying the same margins to RGS14-overexpressing  
183 animals, the two lowest firing rate groups represented 40% of the neurons in controls but  
184 75% in RGS14 ( $p=0.0005$ , Fig. 2G).

185 Moving to neuronal firing during sleep, only faster-firing neurons showed decreases  
186 in firing rate across different wake and sleep states (Fig. S3B) and this was the same for  
187 both groups. Spikes were less phase-locked to the slow oscillations in RGS14-  
188 overexpressing animals, which was seen for all firing rate groups (Fig. 2H,  $p<0.0001$ ).  
189 However, faster-firing neurons contributed the most spiking activity to the upstate and  
190 with a decrease of these neurons in RGS14, these animals presented less spikes in the

191 upstate. This decrease in upstate activity likely underlies the decrease in delta-wave  
192 amplitude.

193 To summarize, RGS-overexpressing animals had more prelimbic neurons with  
194 slower firing rates. These results provide the first causal evidence that increasing synaptic  
195 plasticity shifts the neural firing towards the slow firing end of the neural firing spectrum.  
196 Furthermore, because it is the faster-firing neurons that dominate upstate spiking activity  
197 and therefore delta amplitude, the slowing of firing rates in the more plastic neurons is  
198 most likely the cause of the smaller delta waves seen in these animals.

199  
200

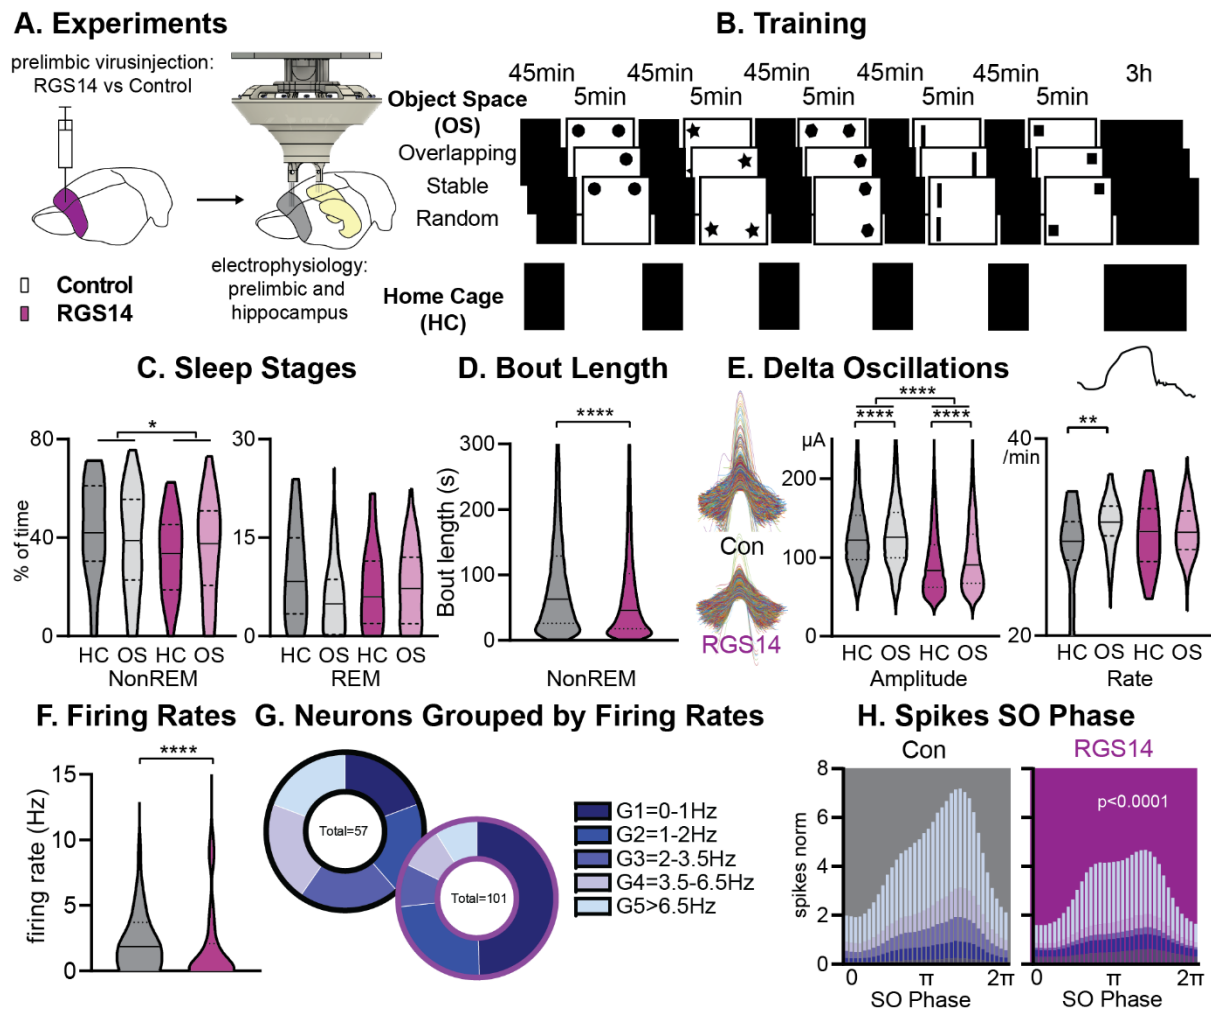

**Fig.2 Sleep and Firing Rates:** **A.** Animals received RGS14 overexpressing (n=4) or control (n=4) virus and were implanted with a hyperdrive (10 tetrode prelimbic, 6 tetrodes hippocampus) three weeks later. **B.** Animals ran the three conditions of the Object Space Task (OS, Stable and Overlapping as described above, Random with constantly moving objects) and a home cage control (HC, same structure of the day but remained awake in recording box during trial periods). **C.** Controls had more NonREM sleep (KS-D=0.17 p=0.05) and no change in REM sleep (KS-D=0.15 p=0.12). **D.** NonREM bout length was longer in controls (KS-D=0.11 p<0.0001). **E.** Delta oscillations had higher amplitude in controls (KS-D=0.34 p<0.0001). In controls amplitude (KS-D=0.04 p<0.0001) and rate (KS-D=0.11 p=0.007) increased after OS, in RGS14-overexpressing animals only amplitude increased (KS-D=0.07 p<0.0001). **F.** RGS14-overexpressing animals had more neurons with lower firing rates (KS-D=0.36 p<0.0001). **G.** Division of neurons according to their firing rates (Chi-square<sub>4</sub>=20.13 p=0.0005). **H.** Spikes were less phase locked to the slow oscillation phase (circ stats p<0.0001 for each neuron group) and less G4-5 neurons led to less spikes during the upstate in RGS14. Control grey, RGS-overexpressing purple, darker shades home cage (HC), lighter shades Object Space Task (OS), \*p<0.05, \*\*p<0.01, \*\*\*\*p<0.0001

201  
 202  
 203  
 204  
 205  
 206  
 207  
 208  
 209  
 210  
 211  
 212  
 213  
 214  
 215  
 216



217 *Increased hippocampal-cortical connectivity during wake and sleep*

218 Interactions between the hippocampus and cortex are critical during encoding as  
219 well as consolidation of memories<sup>15</sup> (Fig. 3A). During wake as well as REM sleep these  
220 interactions take place in the theta domain and can be measured in theta coherence<sup>16</sup>.  
221 In NonREM sleep, they can be captured in the coupling of cortical delta and spindle  
222 oscillations with hippocampal ripples<sup>17</sup>. Different types of interactions between these  
223 three oscillations have been reported; interactions between two oscillations such as delta  
224 followed by spindle<sup>18</sup>, delta followed by ripple<sup>19</sup>, ripple followed by delta<sup>20</sup>, and spindles  
225 with a ripple in their troughs<sup>21</sup>, but also three-oscillation interactions such as delta  
226 followed by spindle with a ripple in the trough<sup>22</sup>, delta followed by ripple then spindle<sup>17</sup>,  
227 ripple followed by delta and then spindle<sup>20</sup>. Interestingly, RGS14-overexpressing animals  
228 presented with higher hippocampal-cortical theta coherence during both task and REM  
229 sleep (Fig. 3B  $p < 0.001$ ) as well as increased occurrences of all types of NonREM  
230 oscillatory coupling (Fig. 3C  $p < 0.001$ ). In controls, we observed an experience-dependent  
231 increase (HC vs OS) in theta coherence ( $p < 0.05$ ) as well as NonREM oscillatory coupling  
232 rate ( $p < 0.001$ , also single spindle rate Fig. S3), confirming the proposed association of  
233 these events to learning. This experience-dependent change was absent in RGS14.

234 Therefore, we could show that increased cortical plasticity led to increased cross-  
235 brain interactions during wake and sleep, emphasizing that decreased interactions and  
236 decoupling of the cortex from the hippocampus enables the protection of older, cortical  
237 memory representations. Further, these findings also highlight that hippocampal-cortical  
238 interactions can be regulated top-down by the cortex and not only by other  
239 neuromodulating brain areas or the hippocampus as previously assumed.

240  
241

## A. Hippocampal - Cortical Interactions

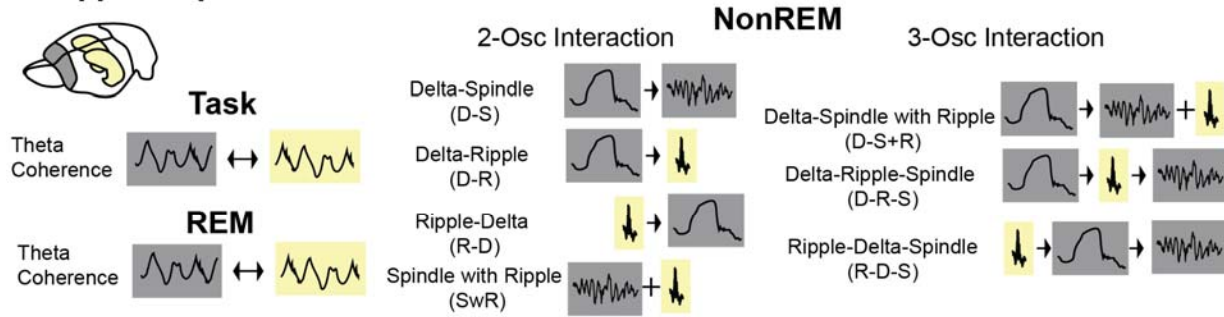

## B. Theta Coherence

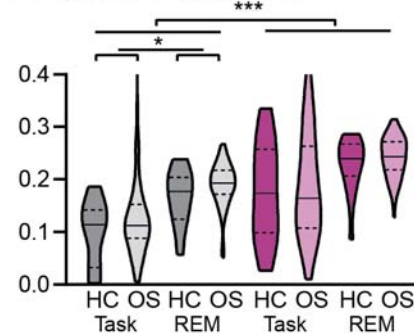

## C. NonREM Event Sequences rate

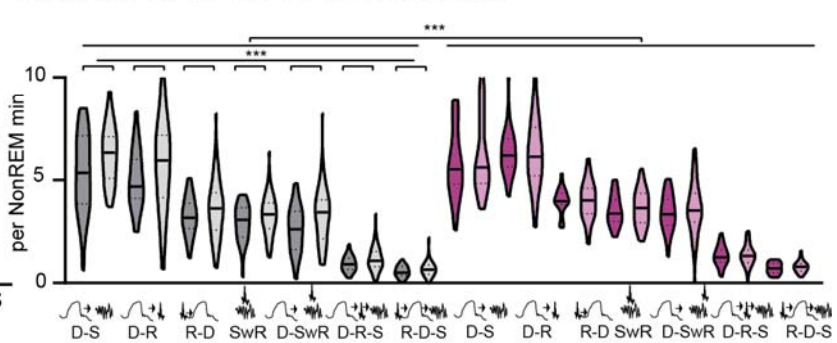

**Fig. 3 Hippocampal-Cortical interactions:** **A.** Brain area interactions are known in Task and REM as theta coherence<sup>16</sup>, in NonREM as oscillatory coupling. **B.** RGS14 showed higher theta coherence (treatment  $F_{1,285}=31.8$   $p<0.001$ ). Only controls showed higher coherence after learning (controls OS vs HC  $F_{1,144}=5.2$   $p=0.024$ , RGS14 OS vs HC  $F_{1,141}=0.6$   $p=0.44$ ). **C.** RGS14 showed generally higher rates of oscillations sequences (treatment  $F_{1,856}=18.7$   $p<0.001$ ), but only in controls could a learning-dependent increase be observed (controls OS vs HC  $F_{1,420}=12.3$   $p=0.001$ , RGS OS vs HC  $F_{1,436}=1.3$   $p=0.25$ ). Control grey, RGS-overexpressing purple, darker shades home cage (HC), lighter shades Object Space Task (OS), \* $p<0.05$ , \*\* $p<0.01$ , \*\*\* $p<0.001$ , \*\*\*\* $p<0.0001$

242  
243  
244  
245  
246  
247  
248  
249  
250  
251

252 *Increasing cortical plasticity leads to changes in hippocampal ripples*

253 Next, we focussed on the hippocampal ripple oscillation in NonREM sleep, which is  
254 linked to memory reactivation, and therefore is suggested to be a key player in the  
255 memory consolidation process<sup>14,23,24</sup>. Increased cortical plasticity led to more, larger and  
256 slower ripples (Fig.4A all  $p < 0.0001$ ). Further, learning in comparison to home cage led to  
257 a decrease in ripple amplitude and increase in frequency in both animals' groups (each  
258  $p < 0.0001$ ). In RGS14 ripples were less phase-locked to the slow oscillation ( $p < 0.0001$ )  
259 and cortical delta power around ripples was decreased in comparison to controls (Fig.4B).  
260 Surprisingly, granger values around ripples measuring directional connectivity were  
261 higher in RGS14-overexpressing animals for Prl→Hpc in the delta frequency range (1-  
262 4Hz) and in the theta/beta range (5-20Hz) for Hpc→Prl (Fig.4B). The excitatory output of  
263 hippocampal ripples can lead to a neuronal response in the cortex<sup>25</sup>. This response was  
264 larger in controls in comparison to RGS14 (Fig. 4C  $p < 0.001$ ) because the average activity  
265 of ripple responsive neurons was higher ( $p < 0.05$ ).

266 In sum, increased cortical plasticity also influenced the hippocampal ripple  
267 oscillation, ripples became larger, more numerous and the corresponding information flow  
268 and cortical neural response was attenuated. Our results imply that there is an important  
269 top-down, cortical influence on this oscillation beyond the known local hippocampal  
270 mechanisms.

271

## A. Ripple Characteristics

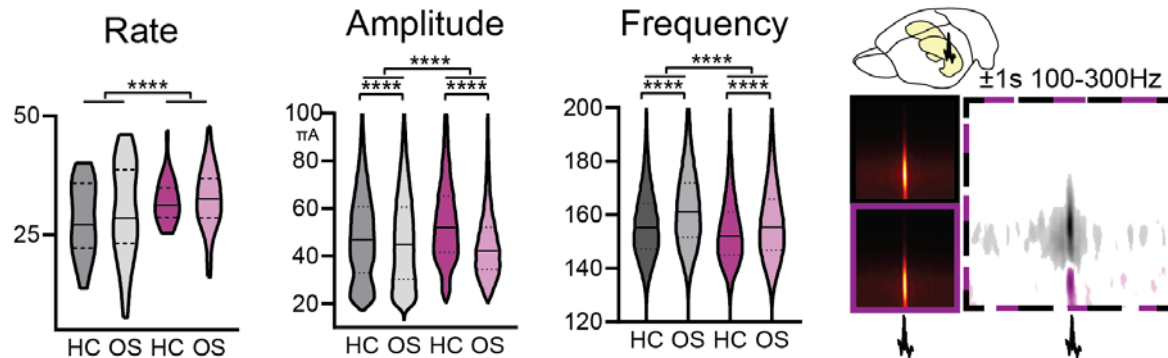

## B. Prelimbic Interactions during Ripples

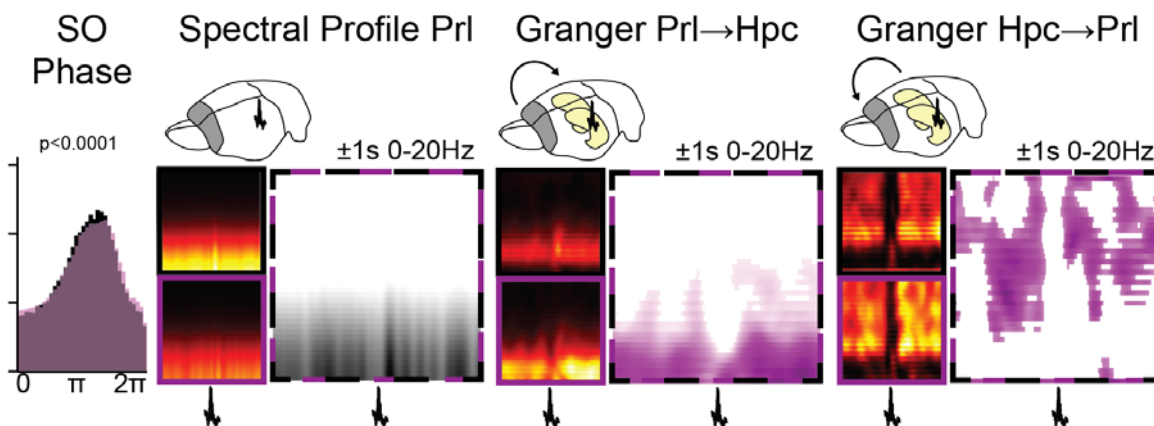

## C. Prelimbic Neural Firing during Ripples

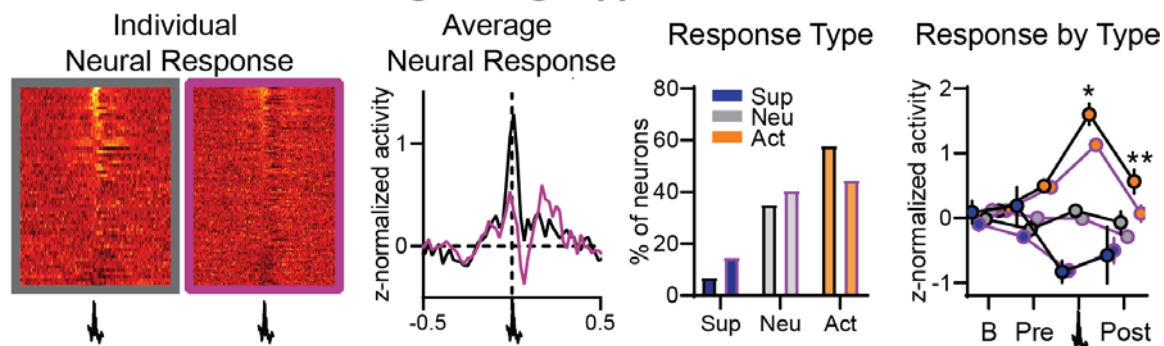

**Fig. 4 Ripples:** **A.** RGS14-overexpressing animals showed changes in ripple rate, amplitude, and frequency (rate KS-D=0.33  $p<0.0001$ , amplitude KS-D=0.13  $p<0.0001$ , frequency KS-D=0.13  $p<0.0001$ ). In both groups OS led to a decrease in amplitude and increase in frequency (vehicle KS-D=0.06  $p<0.0001$ , RGS KS-D=0.25  $p<0.0001$ ). On the right hippocampal (Hpc) spectral profile 1s before and after the ripple in the 100-300Hz range (black Con, purple RGS, dotted Con vs RGS with statistically significant contrast with pixel-based correction for multiple comparison, grey con higher, purple RGS14 higher). **B.** Ripples showed less slow oscillation (SO) phase locking in RGS (phase lock circ stat.  $p<0.0001$ ), which was also reflected in decreased delta power around the ripple (Prelimbic PrL spectral profile 1s before and after the ripple in the 0-20Hz range). Time-frequency granger analysis showed higher delta PrL→Hpc and higher theta/beta Hpc→Prl directional connectivity (black Con, purple RGS, dotted Con vs RGS with statistically significant contrast with pixel-based correction for multiple comparison). **C.** Neural firing during ripples in prefrontal cortex. From left to right: individual neuron response (each row one neuron) aligned to ripple (middle); average response across neurons (rmANOVA treat\*time  $F_{98,15288}=2.7$   $p<0.001$ ); neurons were categorized into types with ripple suppressed (blue), ripple neutral (grey) and ripple active (orange, Chi-square 3.46  $p=0.18$ ); for each types the response at baseline (200-120ms before ripple), pre-ripple (120ms-40ms before ripple), during ripple (40ms before – 40ms after ripple peak), and post-ripple (40ms-120ms after ripple, rmANOVA treat\*ripple response  $F_{2,162}=3.2$   $p=0.043$ , post-hoc RGS vs. Con active neurons during  $p=0.015$  and after  $p=0.003$ ). Control grey, RGS-overexpressing purple, darker shades home cage (HC), lighter shades Object Space Task (OS), \* $p<0.05$ , \*\* $p<0.01$ , \*\*\* $p<0.001$ , \*\*\*\* $p<0.0001$

272  
273  
274  
275  
276  
277  
278  
279  
280  
281  
282  
283  
284  
285  
286  
287  
288

289 **Discussion**

290 By increasing plasticity in the prelimbic cortex via the overexpression of RGS14 and  
291 combining this with behavioural, pharmacological, computational, and  
292 electrophysiological approaches, we tested the long-standing but unproven idea of a  
293 slow- and fast-learner in the brain. Our data strongly suggests that restricted cortical  
294 plasticity is needed to protect memories from interference, the first experimental  
295 confirmation of Marr and McClelland's ideas that have fundamentally shaped our concepts  
296 of memories. Increasing plasticity enhanced one-trial memory, increased memory  
297 interference in our semantic-like memory paradigm and learning-rate in our modelling  
298 approach. Signatures of cross-brain connectivity – hippocampal-cortical theta coherence,  
299 NonREM oscillation coupling, granger causality analysis of ripple events – were all  
300 increased after our plasticity manipulation. However, experience-dependent increases,  
301 that were present in controls, were lacking in RGS14 animals. Increased plasticity in the  
302 prelimbic cortex also changed hippocampal ripple oscillations, arguing for a top-down  
303 control of the cortex on this oscillation.

304 Interestingly, while most signatures of learning were increased, some seemed to  
305 break down. Contrary to predictions by the SHY hypothesis<sup>11,12</sup>, delta waves were smaller  
306 in RGS14-overexpressing animals. The cause is likely the general decrease in firing rates  
307 accompanying increased plasticity. Slower-firing neurons were less phase locked to the  
308 slow oscillation and less neuronal firing in the upstate led to smaller delta waves. It has  
309 been previously proposed that slow-firing neurons are more plastic than fast-firing ones  
310<sup>14</sup>. The current evidence, however, was mainly correlational. Our results provide the first  
311 causal evidence that increasing synaptic plasticity shifts the neural firing towards the slow  
312 firing end of the neural firing spectrum. Furthermore, our results highlight the complex  
313 interaction of proposed plasticity-related mechanisms present in firing-rates and sleep  
314 oscillations.

315 While RGS14-overexpressing animals had more ripples and cortical-hippocampal  
316 interactions, the response of cortical neurons to ripples remained lower than in controls.  
317 The current prevalent view on hippocampal ripple oscillations is that they are essential  
318 for memory consolidation. Furthermore, it is believed that they are generated mainly as  
319 an outcome of the local synaptic interactions within the hippocampus inducing changes  
320 in several cortical areas and supporting the broadcasting of information from the  
321 hippocampus to the cortex<sup>23</sup>. Our results imply that there is an important top-down,  
322 cortical influence on this oscillation beyond the known local hippocampal mechanisms.  
323 Furthermore, and in alignment with existing results, it shows that hippocampus doesn't  
324 reactivate random incoming sensory information, instead it orients itself to the previous  
325 knowledge acquired by the cortex<sup>26,27</sup>.

326 To conclude, we could show that increasing plasticity in the prelimbic cortex  
327 enhances the ability to retain one trial information but this negatively impacts abstracted,  
328 cumulative memory representations and the ability to distinguish learning experiences,  
329 confirming long-standing but unproven memory system theories. Furthermore, changes

330 in cortical plasticity affect neuronal firing rates, hippocampal-cortical connectivity, cortical  
331 delta waves and hippocampal ripples.

332

333

## 334 MATERIALS AND METHODS

### 335 **Study design**

336 A total of 72 rats were used in this experiment: 64 in the behavioral experiment and 8 in the  
337 electrophysiological recordings. In each case animals were first extensively handled for multiple days (at  
338 least 3) until they did not flinch when the experimenter touched them (see handling videos on  
339 [www.genzellab.com](http://www.genzellab.com)). Next, all animals underwent viral-injection surgery (see below), half the animals  
340 received RGS14<sub>414</sub>-lentivirus while the other had a vehicle (empty) lentivirus. In addition, 32 animals also  
341 received pharmacological cannula's targeting prelimbic region during this surgery (16 vehicle, 16 RGS).  
342 These and the other 32 behavioural animals had a 2-week surgery recovery and then went on to do the  
343 habituation as well as training in the Object Space Task (all conditions counterbalanced within animal). The  
344 8 electrophysiology animals (4 vehicle, 4 RGS) received a second surgery three weeks after the first one,  
345 for hyperdrive implantation. During 2–3-week surgery recovery, tetrodes were slowly lowered to target area  
346 before the animals also had habituation and training in the Object Space Task.

347 All data will be available on the Donders Repository.

348

### 349 **Animals**

350 Three-month-old male Lister Hooded rats weighing between 300-350 g at the experiment start  
351 (Charles Rivers, Germany) were used in this study. Rats were pair-housed in conventional eurostandard  
352 type IV cages (Techniplastic, UK) in a temperature-controlled (20 + 2 °C) room following a 12 h light/dark  
353 cycle with water and food provided *ad libitum*. After lentiviral surgical intervention, animals were single-  
354 housed for two days and paired with their cage mates after recovery in rat individually ventilated cages  
355 (IVC; Techniplastic, UK). Animals were maintained in their IVC in a barrier room for 14 days before  
356 downscaling them to conventional housing conditions. After hyperdrive implantation, rats were single-  
357 housed in until the end of the experiment. A total of 72 rats were used in this experiment: 64 in the behavioral  
358 experiment (n=16 per group, RGS14<sub>414</sub>, vehicle, across two cohorts of 8-8 animals each; and n=16 per  
359 group RGS14<sub>414</sub>-pharma, vehicle-pharma group across two cohorts of 8-8 animals each), and 8 in the  
360 electrophysiological recordings (n=4 per treatment, RGS14<sub>414</sub>, and vehicle, split one animal per treatment  
361 across four cohorts). The behavioral experiments and electrophysiological recordings were performed  
362 during the light period (between 9:00-18:00).

363 All animal procedures were approved by the Central Commissie Dierproeven (CCD) and conducted  
364 according to the Experiments on Animals Act (protocol codes, 2016-014-020 and 2016-014-022).

365

### 366 **RGS14<sub>414</sub>-lentivirus**

367 The RGS14<sub>414</sub>- and vehicle-lentivirus solutions (1.72 x 10<sup>7</sup> CFU/ml and 2.75 x 10<sup>6</sup> CFU/ml  
368 respectively) were prepared and provided by Dr. Zafaruddin Khan at the University of Malaga (Malaga,  
369 Spain)<sup>28, 29</sup>. Briefly, the RGS14<sub>414</sub> gene (GenBank, AY987041) was cloned into the commercial vector p-  
370 LVX DsRed Monomer-C1 (Clontech, France) using DNA recombinant technology. Then, both non-replicant  
371 RGS14<sub>414</sub>- and vehicle-lentivirus (empty vector) were prepared and titered using the Lenti-XTM (Clontech,  
372 France) according to the manufacturer's instructions.

373 The animal's procedures related to the non-replicant lentiviral solution were approved and carried  
374 out in compliance with institutional regulation.

375

### 376 **Tetrode hyperdrive**

377 A customized lightweight tetrode micro-drive was manufactured to implant 10 and 6 movable tetrodes  
378 in the prelimbic cortex and hippocampus (HPC), respectively<sup>30-32</sup>. Two separate bundles of #33 polyimide  
379 tubes (Professional Plastics,) were prepared: one of 2 columns x 5 rows for prelimbic cortex and 3 X 3 for  
380 HPC. The bundles were fixed first to the customized 3D printed cannula and then into the customized 3D  
381 printed body drive. The 3D printed cannula was designed according to the Rat Brain Atlas in Stereotaxic  
382 Coordinates<sup>33</sup> for the correct placement of the bundles in the areas of interest. Inner tubes (#38 Polyimide

383 tubes; Professional Plastics) were placed inside the outer tubes and glued to the shuttle, which moves  
384 through the body spokes thanks to an inox steel screw and a spring CBM011C 08E (Lee spring, Germany).  
385 A total of 16 tetrodes were built, twisting four 10 cm polyimide-insulated 12  $\mu$ m Nickel-Chrome wires (80  
386 turns forward and 40 turns reverse) (Kanthal Precision, Florida) and fused by heat. Tetrodes were loaded  
387 in the inner tubes, and their free ends were connected to a customized 64 channels, 24 mm round electrode  
388 interface board (EIB) using gold pins (Neuralynx). Previously, 2 NPD dual row 32 contact connectors  
389 (Omnetics) had been attached to the EIB. The tetrode tips were cut using fine sharp scissors (maximum  
390 length 3.5 mm and 3 mm for prelimbic cortex and HPC, respectively) and fixed to the inner tubes in the  
391 upper part. Tetrode tips were clean in distilled water and gold-plated (gold solution, Neuroalynx) using  
392 NanoZ software to lower their impedance to 100–200 k $\Omega$  and improve the signal-to-noise ratio. The tetrode  
393 tips were hidden at the same level as the bundle. The whole drive was covered with aluminum foil connected  
394 to the ground to reduce the electrostatic interference during the recordings. The bottom of the micro-drive  
395 was deepened in 70 % ethanol for 12 hours before brain implantation.

396

397

## ***Stereotaxic surgeries***

398

### ***Lentivirus injection***

399

400

401

402

403

404

405

406

407

408

409

410

411

412

413

414

415

416

417

418

419

420

421

422

423

424

425

426

427

428

429

Lentiviral solutions were infused in the prelimbic cortex using stereotaxic surgery under biosafety level 2 conditions. The coordinates of the prelimbic cortex injection site were +3.2 mm AP, +/-0.8 mm ML from Bregma, and -2.5 mm DV from dura mater, according to The Rat Brain Atlas from Paxinos and Watson<sup>33</sup>. The procedure was carried out under isoflurane inhaled anesthesia. Unconsciousness was induced at 5 % isoflurane + 1 l/min O<sub>2</sub> and maintained at 1.5-2 % isoflurane +1 l/min O<sub>2</sub>. A 0.8 mm diameter craniotomy was drilled above the target area in each hemisphere. The DV dura mater coordinate was measured before performing the durotomy.

A 30 G dental carpule connected to a 10  $\mu$ l Hamilton and an infusion pump (Micro-pump, WPI) was slowly inserted into the brain target area (0.2 mm/min). A total volume of 2  $\mu$ l of the lentiviral solution was infused at 200 nl/min. After 5 minutes of diffusion, the needle was removed, and the incision was sutured.

For the anisomycin infusions, 32 animals were implanted with a 26 G bilateral guide cannula (3 mm length and 1.6 mm inter-cannula distance; Plastic1 Technology, USA) above prelimbic cortex (AP +3.2 mm, ML +/- 0.8 mm from Bregma and DV -0.5 mm from dura mater<sup>33</sup>). Three supporting screws 1 mm X 3 mm were driven approx. 0.9-1 mm into the skull around the cannula. The bilateral cannula was slowly inserted into the brain target area (0.2 mm/min) after dura matter was removed. The whole structure was attached to the previously scratched skull by Metabond (Sun Medical, Japan) and simplex rapid dental cement (Kemdent, UK). The lentivirus infusions took place similarly as explained above, but using a 30 G bilateral internal cannula with a 2 mm projection length from the guide cannula (Plastic1 Technology, USA). The final DV coordinate was -2.5 mm from the dura mater. After 5 minutes of diffusion, the internal cannula was removed, the guide cannula was protected with a bilateral dummy cannula without projection and its cap.

Temperature, oxygen saturation, and blood pressure were monitored during the whole surgical procedure. Some eye cream (Ophthosam) was applied to protect the corneas during the intervention. At the start and end of the surgery, 2 ml of 0.9% NaCl physiological serum was administered subcutaneously. As analgesia, animals were administered 0.07 mg/ml carprofen in their water bottles two days before and three days after surgery. Immediately before surgery, 5 mg/kg carprofen was sc injected. In addition, a mix of 4 mg/kg lidocaine and 1 mg/kg bupivacaine in a 0.9% NaCl physiological serum was administered sc locally in the head.

After the viral injection, animals were housed individually in rat IVC cages for 14 days. Their weights and status were monitored daily for the correct recovery of animals. Then, rats were pair housed with their previous cagemate and moved to conventional housing.



### *Tetrode hyper-drive implantation*

Twenty-one days after viral infusion, a second stereotaxic surgery took place for tetrode micro-drive implantation in 8 animals. The procedure was similar as described above. In this intervention additionally, a prophylactic 10 mg/kg sc injection of Baytril antibiotic was administered at the beginning of the surgery. Two craniotomies (2x1 mm and 1x1 mm for prelimbic cortex and HPC, respectively) were drilled above the target areas on the right hemisphere. The coordinates for the upper left corner of each craniotomy were: AP +4.5 mm and ML -0.5 (prelimbic cortex) and AP -3.8 mm and ML -2 mm (HPC) from Bregma<sup>33</sup>. A ground screw (M1x3) was placed on the left hemisphere in the cerebellum (AP -11 mm, ML +2 mm from Bregma). In addition, six M1x3 mm supporting screws were driven and bound to the skull using Super-bond C&B dental cement (Sun Medical, Japan). Carefully, the durotomies were performed, and the brain's surface was exposed. Subsequently, the micro-drive was positioned on the brain's surface, and attached to the skull and the screws by simplex rapid dental cement (Kemdent, UK). Then, tetrodes were slowly screw-driven into the prelimbic area in prelimbic cortex (3 mm DV from brain surface) and the cortical layers above the HPC (1.5 mm DV from brain surface). The dorsal hippocampal CA1 pyramidal layer was reached progressively in the subsequent days.

### *Pharmacological infusion*

Anisomycin (ANI) powder (Merck, Germany) was solved in 1 M HCl in 0.9% NaCl physiological serum, and the pH was adjusted with 10 µl of 5 M NaOH. Aliquots were prepared and stored at -20°C until the moment of use. Immediately after the 24 h test in the object space task, animals were infused with 3 µl/hemisphere of a 25.6 µg/µl ANI solution or the solvent as control at 300 nl/min. An infusion pump and two 10 µl Hamilton syringes connected through a PE10 tube (Plastic1;) to a customized 30 G bilateral internal cannula with a 2 mm projection (Plastic1;) was used for the infusion. The internal cannula was carefully removed after 3 minutes of diffusion time, and the dummy and cap were placed back. All the animals from Experiment 2 received the infusion of both ANI and vehicle across different weeks for each experimental paradigm.

### *Object Space Task*

The Object Space Task (OST) is a newly developed behavioral paradigm to study simple and semantic-like memories in rodents<sup>34</sup>. The task is based on the tendency of rodents to explore novel object-location in an open field across multiple trials. In these experiments, the OST took place as described previously<sup>34</sup> at least 21 days after the viral infusion when the effect of the RGS14<sub>414</sub> protein is observed<sup>28,29</sup>. Briefly, animals were handled for 5 consecutive days before and after surgery recovery. Then, rats were accommodated in the experimental room and habituated to the open field across 5 sessions (one per day). In the first session, animals explored the open field with their cagemate for 30 minutes. In the rest of the session, each individual freely explored the open field for 10 min. Two Duplo objects were included in the open field center in the last two sessions to facilitate a better exploration time in the subsequent task.

The OST consists of two phases: a training phase of 5 training trials in which animals are exposed to two identical objects (different across trials) for 5 minutes (45-55 min intertrial time); and a interference/test phase consisting of a single 10 min' trial performed 24 h and 72 h after training. In the stable condition, both object locations were fixed during the training trials, and one object location was moved during the interference and tests sessions. In the overlapping condition, one object location was fixed, and the other one moved across training trials. In the interference and test sessions, the same object-location pattern from the last training trial was repeated.

The open field was a wooden square 75 x 75 x 60 cm. For the task, but not for the habituation, we placed 2D proximal cues on the open field walls and 3D distal cues above the open field. The cues were changed in each experimental session. In addition, the open field base colors changed across task sessions (white, blue, green, brown). The objects used vary in material (plastic, glass, wood, and metal), size, and colors. For electrophysiological recordings, not plastic objects were used to prevent static interference. All

479 object bases were attached to 10 cm x 10 cm metal plates. Circular magnets were installed in the corners  
480 underneath the open field floor to prevent object movements during exploration. The open field and object  
481 surfaces were cleaned with 40% ethanol between trials to avoid odor biases.

482 Each trial was recorded using a camera above the open field. The object exploration time was  
483 manually scored *online* using the homemade software 'Scorer32'. The experimenter was blinded for  
484 treatment and experimental conditions at the moment of scoring. Object locations and experimental  
485 conditions were counterbalanced across treatments, individuals, and sessions.

486 For electrophysiological recordings, we run four cohorts of 2 animals each. Each cohort included one  
487 vehicle- and one RGS14<sub>414</sub>-treated animal, which performed the identical condition sequences with the  
488 same object-location patterns. Object locations and experimental conditions were counterbalanced across  
489 cohorts. Electrophysiological recordings took place during trials and rest periods (45 min before and 3 h  
490 after both training and test; and 45 min intertrial time during the training). Therefore, two brown wooden  
491 sleep boxes (40 x 75 x 60 cm height) with bedding material were placed next to the open field. Animals had  
492 been accustomed to the sleep box for at least 3 h in each open field habituation session.

493 Rats involved in the electrophysiological recordings also performed two experimental control  
494 conditions: homecage and random. The random condition was carried out as described previously<sup>34</sup>, so  
495 there was a lack of repetitive object location patterns across different trials. In the homecage, the animal  
496 was recorded for 7 h and 10 min in the sleep box (a whole training session recording), and the experimenter  
497 kept the rat awake for the equivalent trial times.

498

### 499 ***In vivo electrophysiology recordings***

500 In vivo freely moving extracellular recordings were executed during the OST and the resting periods.  
501 One session per experimental condition (homecage, stable, overlapping, and random) was carried out per  
502 animal. The local field potential (LFP) and single-unit activity detected by the 64 channels were amplified,  
503 filtered, and digitized through two 32 channels chip amplifier headstages (InstanTechnology) connected  
504 through the Intan cables and a commutator into the Open Ephys acquisition box. The signal was visualized  
505 using the open-source Open Ephys GUI (sample rate 30 kHz). In addition, the headstage contains an  
506 accelerometer to record the movement of the animals.

507

### 508 ***Tetrode electrolytic lesions***

509 After all the recording sessions, the tetrode-implanted animals received brain electrolytic lesions 48  
510 h before the transcardial perfusion to identify the electrode tips placement. Thus, a current of 8  $\mu$ A for 10 s  
511 was applied in two wires per tetrode using the stimulator with the animal under isoflurane inhaled  
512 anesthesia.

513

### 514 ***Histology***

#### 515 ***Brain processing***

516 After data collection, animals had overdoses with 150 mg/kg sodium pentobarbital ip. Rats were  
517 transcardially perfused first with 80 ml of 0.1 M phosphate-buffered saline pH 7.4 (PBS) and then with 250  
518 ml of 4% (w/v) paraformaldehyde in 0.1 M phosphate-buffered pH 7.4 (PFA). After brain extraction, it was  
519 immersed in PFA overnight at 4°C. Then, the brains were rinsed in PBS 3 times for 10 min and  
520 cryoprotected by deepening in 20 ml of 30% (w/v) sucrose, 0.02% (w/v) NaN<sub>3</sub> in PBS. Once brains sank  
521 (after 2-3 days approx), they were frozen in dry ice and stored at -80°C. Finally, 30 or 50  $\mu$ m coronal  
522 sections of target areas were obtained using the cryostat (SLEE medical, Germany), collected in 48-well  
523 plates containing 0.02 % (w/v) NaN<sub>3</sub> PBS and stored at 4°C.

524

#### 525 ***Immunohistochemistry***

526 The overexpression of rgs14<sub>414</sub> was checked by free-floating fluorescence immunohistochemistry.  
527 First, the target sections were selected, rinsed in PBS, and incubated overnight at 4°C with the rabbit

528 polyclonal anti-RGS14 antibody (Novus biological, NBP1-31174; dilution 1:500). Then, the Alexa fluor®  
529 488-conjugated goat anti-rabbit IgG (Life Technologies, A11008; dilution 1:1000) at room temperature for  
530 2.5 h. Some drops of water-soluble mounting medium containing DAPI (Abcam, ab104139) were applied  
531 for 5 min before placing the coverslip. Leica fluorescence microscope (Leica DM IRE2) and camera were  
532 used to observe and photograph the samples.  
533

### 534 *Nissl staining*

535 Coronal sections were AP sequentially mounted on gelatin-coated slides and incubated at 37 °C  
536 overnight. Slices were hydrated first in 0.1 M PBS pH 7.4 and then in Milli Q water for 20 min each. Next,  
537 brain sections were stained in 0.7 %(w/v) acetate cresyl violet for 20 min and dehydrated in an increasing  
538 ethanol gradient (water for 3 min, 70% ethanol for 20 s, 96% ethanol+acetic acid for 45 s, 100% ethanol for  
539 5 min). Lastly, the tissue was immersed in xylene for 15 min, and the coverslip was placed using some  
540 DePeX mounting medium drops. Cannula placement, infusion traces, or/and tetrode lesions were observed  
541 and photographed under a light field microscope (Leica DM IRE2) and a camera.  
542

### 543 *Sleep scoring*

544 Different states (wakefulness, NonREM, REM, and Intermediate) were *off-line* manually scored  
545 using, 'TheStateEditor' developed by Dr. Andres Grosmark at Dr. Gyorgy Buzsaki lab. One channel per  
546 brain area (Prelimbic cortex and HPC) was selected per animal. The frequency spectrograms and bandpass  
547 filtered LFP signal were computed per brain area, and the motion spectrogram. Using a 10 s sliding window,  
548 an experienced researcher created the hypnogram and 1 s epoch vector indicating brain states. The  
549 absences of movement in the motion spectrogram discriminate between wakefulness and sleep. During  
550 sleep periods, a dominant theta frequency in the dorsal hippocampus in the absence of spindles and delta  
551 waves indicated REM sleep. NonREM sleep was classified when slow oscillations were detected in the  
552 prelimbic cortex. The intermediate phase was defined as short transitional periods between NonREM and  
553 REM that show an increase in frequency in the prelimbic cortex and frequency similar to theta in the dorsal  
554 hippocampus. Microarousals were defined later on as periods of wakefulness  $\leq 15$  s within a sleep period.  
555

### 556 *Behavioral data analysis*

#### 557 *Object Space Task.*

558 The total exploration time was calculated as the sum of the time spent exploring both object locations.  
559 The discrimination index (DI) was computed by subtracting the familiar object location exploration time to  
560 the novel object location and dividing it by the total exploration time. A DI > 0 means a preference for the  
561 new object location and consequently memory from the previous episode. A DI = 0 shows no preference  
562 for either the new object location or the fixed one. DI < 0 means a preference for the stable object location.  
563

### 564 *Model*

565 The same computational model as in (Genzel et al., 2019) was used (see article for more detailed  
566 methods). In short, the model learns place-object associations and then translates this memory into an  
567 exploratory behavior: the objects that were stably found at the same location have a very low uncertainty  
568 and are thus either less attractive or more attractive (depending on the individuals) during exploration than  
569 objects found at changing locations (high uncertainty in place-object association). The source code of the  
570 computational model and model simulation/fitting procedures is available here:  
571 <https://github.com/MehdiKhamassi/ObjectSpaceExplorationModel>

572 The model employs two different parameters: a learning rate  $\alpha$ , which determines the speed of  
573 memory accumulation; an inverse temperature  $\beta$ , which determines the strength and sign of memory  
574 expression during exploratory behavior.

575 A low learning rate  $\alpha$  (i.e., close to 0) means that the model will need numerous repetitions of the  
576 same observation (i.e., in the Object Space Task, many trials observing the same place-object association)  
577 to properly memorize it. In contrast, a high learning rate  $\alpha$  (i.e., close to 1) means that the model quickly  
578 memorizes new observations at the expense of old observations which are more quickly forgotten. As a  
579 consequence, with a low learning rate the exploratory behavior generated by the model will mostly reflect  
580 remote memories but not recent ones (semantic-like memory). Conversely, with a high learning rate,  
581 exploratory behavior in the model will mostly reflect recent memories but not remote ones (episodic-like  
582 memory).

583 Finally, an inverse temperature  $\beta$  close to zero means that the model does not strongly translate  
584 memories into object preferences for exploration, thus showing little object preference. In contrast, a high  
585 inverse temperature will mean that the model's exploratory behavior is strongly driven by differences in  
586 relative uncertainty between place-object associations. A high positive inverse temperature ( $\beta > 0$ ) will result  
587 in neophilic behavior: the model spends more time exploring objects associated with high uncertainty (i.e.,  
588 novelty or constantly changing location); a high negative inverse temperature ( $\beta < 0$ ) will result in neophobic  
589 behavior: the model spends more time exploring objects with low uncertainty (stable/familiar objects).

590 The model was fitted to each mouse's trial-by-trial behavior using a maximum likelihood procedure  
591 described in (Genzel et al., 2019), and similar to state-of-the-art model fitting methods in cognitive  
592 neuroscience (Collins & Wilson, 2019). In brief, this model fitting process found the best parameter values  
593 for each subject that best explain the relative proportion of time spent exploring each object at each trial.  
594 The main operations of the model are summarized in **Figure 1F**. All model equations are described in <sup>10</sup>.

595

## 596 **Sleep architecture analysis**

597 *Macroarchitecture.* The total sleep time (TST), total wakefulness time, and total time for different  
598 sleep states (NonREM, REM, and Intermediate) were computed per session on MATLAB. The average  
599 across sessions was calculated per rat, and the mean and SEM were computed per treatment. Additionally,  
600 the % of TST of NonREM time, REM time, and intermediate time were calculated for the 3 h recording post-  
601 training.

602

603 *Microarchitecture.* The distribution of bout duration per stage was computed per treatment. The bouts  
604 number and duration were calculated per resting period and state. Only bouts longer than 4 seconds were  
605 considered for the analysis. The 1 s epoch state vectors of each session were concatenated with the  
606 interleaved trial wakefulness. NonREM episodes were defined as consecutive NonREM bouts without  
607 considering microarousals. Sleep period was described as an event of sleep between wake events  $\geq 300$   
608 s. Each sleep period could include several NonREM periods defined as NonREM episodes without  
609 considering microarousals, or NonREM episodes followed by transitional stages and/or sleep cycles  
610 defined as NonREM episodes followed by transitional states and REM or NonREM followed by REM. In  
611 sleep, periods can include quiet wakefulness  $< 300$  s. The number of sleep periods and the average  
612 duration per treatment were calculated on MATLAB. Additionally, the count and duration of NonREM  
613 periods and sleep cycles were also computed per treatment.

614

## 615 **Local field potential analysis**

### 616 *Signal preprocessing*

617 For the following analyses, first a single channel was selected per brain area. For prelimbic cortex, the  
618 channel with the largest slow oscillations was chosen. For hippocampus, the channel closest to the  
619 pyramidal layer, which displayed noticeable ripples was selected. Both channels were originally acquired  
620 at a sampling rate of 30 kHz and to avoid working which such a high rate, the channels were filtered with a  
621 3<sup>rd</sup> order Butterworth lowpass filter at 500 Hz to avoid signal aliasing and then downsampled to 1 kHz.

622

623 *Theta coherence*

624 Theta coherence was computed as the magnitude squared coherence using the *mscohere* function in  
625 MATLAB and a custom-written script that collected the downsampled data from different animals and study  
626 days. The magnitude squared coherence was calculated as follows:

627

$$628 \quad C_{xy}(T) = \frac{|P_{xy}(T)|}{P_{xx}(T)P_{yy}(T)}$$

629 where  $C_{xy}$  is the magnitude coherence,  $P_{xy}$  is the cross spectral density of the hippocampal and prelimbic  
630 cortex signal,  $P_{xx}$  is the hippocampal signal, and  $P_{yy}$  is the prelimbic cortex signal. The coherence analysis  
631 focused on two periods of interest namely, WAKE and REM periods. Since REM sleeping periods might  
632 occur several times over several sleeping cycles, REM periods from pre and posttrial sleep were first  
633 extracted and concatenated together before running the analysis. For both Wake and REM periods, the  
634 power and cross-power spectra were computed on overlapping time windows of 1 second with 80% overlap.  
635 Then, the theta coherence was computed as the average value over the theta frequency range (5-12 Hz)  
636 for the Object Space (Stable, Overlapping and Random) and home cage conditions.

637

638 *Detection of spindles and delta waves*

639 The downsampled prelimbic cortex channel (1kHz) was loaded and using a 3<sup>rd</sup> order Butterworth  
640 filter the signal was filtered to 9-20Hz for detecting spindles and to 1-6Hz for detecting delta waves. The  
641 NonREM bouts were then extracted from the filtered signal and concatenated. The functions FindSpindles  
642 and FindDeltaWaves from the Freely Moving Animal (FMA) toolbox <http://fmatoolbox.sourceforge.net> were  
643 modified and used to detect the start, peak and end of spindles and delta waves respectively. The optimal  
644 threshold was found for each animal by visually inspecting the detections and modifying the default  
645 parameters of the functions when needed. The results were saved as timestamps with respect to the  
646 concatenated NonREM signal in seconds. They were then used to find the timestamps with respect to the  
647 recorded signal. This process was repeated for pre and post trial sleep periods in study days pertaining to  
648 all animals in both treatment groups.

649

650 *Ripple Detection*

651 The downsampled channels (1kHz) of the hippocampal pyramidal layer were loaded and the  
652 NonREM bouts were extracted. Using a 3<sup>rd</sup> order Butterworth bandpass filter, the epochs of HPC signal  
653 were filtered to a frequency range of 100-300Hz. A custom MATLAB function was used for detecting the  
654 start, peak and end of the ripples by thresholding voltage peaks which lasted a minimum duration of 30 ms  
655 above the threshold. The start and end of the ripple were determined as half the value of the selected  
656 threshold. The standard deviations of concatenated NonREM bouts were computed individually for  
657 presleep and all post trials in a study day. The average of these standard deviations was calculated to find  
658 a single detection threshold per study day. An offset of 5 units was added to the threshold to reduce false  
659 positives. This was repeated for all study days pertaining to all animals in both treatment groups.

660

661 *Oscillations characteristics*

662 The traces of each event detected (ripples, spindles, delta waves) were extracted using the start and  
663 end timestamps obtained from the detectors. The traces of the events were filtered in their corresponding  
664 detection frequency band. Characteristics such as the amplitude and mean frequency were calculated for  
665 these filtered events using built-in and custom MATLAB functions. Namely, the amplitude of the events was  
666 calculated by computing the envelope of the filtered trace using a Hilbert transform. The absolute value of  
667 the result was taken and its maximum was found. The mean frequency of the filtered traces was computed  
668 using the *meanfreq* function of MATLAB.

669

670 *Detection of oscillation sequences*

671 The sequences between ripples, spindles and delta waves were counted in various combinations to  
672 study cortico-hippocampal coupling during NonREM sleep as done by Maingret et. al. <sup>20</sup>. The time  
673 difference between the peaks of these events was compared to a fixed duration to establish if there was a  
674 sequential relationship in the following combinations of oscillations: Delta-Spindle (D-S), Delta-Ripple (D-  
675 R), Ripple-Delta (R-D), Ripple-Delta-Spindle (R-D-S). For D-S a sequence was considered when the  
676 duration between events was between 100-1300 ms, for D-R it was 50-400 ms and for R-D it was 50-250  
677 ms. To find R-D-S sequences, the results of R-D and D-S were compared to find delta waves preceded by  
678 a ripple and followed by a spindle. The results were saved as counts of each sequence for each post-trial.  
679

680 *Co-occurrence between ripples and spindles*

681 The co-occurrence between ripples and spindles was computed by comparing the start and end  
682 timestamps of both events. To consider co-occurrence between a ripple and a spindle, either one of the  
683 following conditions had to be fulfilled. 1) A ripple had to start and end within the duration of the spindle. 2)  
684 One of the events had to start or end within the duration of the other. Given that more than one ripple can  
685 co-occur with the same spindle, we counted separately spindles co-occurring with spindles and spindles  
686 co-occurring with ripples.  
687

688 *Slow oscillation phase*

689 The downsampled prelimbic cortex signal was filtered in the 0.5 to 4 Hz range using a 3<sup>rd</sup> order  
690 Butterworth bandpass filter and its Hilbert transform was computed to find the phase angle of slow  
691 oscillations in a range from 0° to 360°. The peaks of ripples and spindles were then used to find the  
692 corresponding slow oscillation phase. This same signal was later used to find the phase during spikes  
693 timestamps of cortical neurons.  
694

695 *Spectral analysis and Granger causality*

696 A two-second-long window centered on each ripple peak was extracted from the hippocampus and the  
697 prelimbic cortex channels respectively. All ripples across animals and conditions were combined per  
698 treatment and their amplitude was computed by finding the maximum of their envelope computed with a  
699 Hilbert transform. The median ripple amplitude was calculated and the corresponding two-second-long  
700 windows of the 2000 ripples which amplitude was the closest to the median amplitude were included in the  
701 following analysis. A notch filter at 50 Hz was applied to the ripple-centered windows using the  
702 `ft_preprocessing` function from the Matlab-based Fieldtrip toolbox <sup>35</sup>. The Short-time Fourier transformation  
703 was calculated to detect the changes of spectral power in hippocampus and prelimbic cortex with respect  
704 to a time window of  $\pm 1$  second around each ripple. This was computed using the `ft_freqanalysis` function  
705 from Fieldtrip with a 100 ms Hanning window and time steps of 10 ms, for a frequency range from 100 to  
706 300 Hz with a 2 Hz step for hippocampus and from 0.5 to 20 Hz with a step of 0.5 Hz for prelimbic cortex.  
707 The resulting spectrograms were averaged and displayed. To statistically compare spectrograms between  
708 treatments, a nonparametric permutation test to correct for multiple comparisons with two-tailed pixel-based  
709 statistics was computed using 500 permutations and a p-value of 0.05 <sup>36</sup>.

710 To determine the predictive power between brain regions during ripples, the time-frequency Spectral  
711 Granger Causality was computed for each directionality <sup>37</sup>. A window with length of 2.2 seconds centered  
712 around each ripple peak was extracted for the simultaneous hippocampal and prelimbic cortex signals. The  
713 length of this window was chosen to at least capture one cycle of 0.5 Hz activity. A two-second-long time-  
714 frequency non-parametric Spectral Granger causality was computed by implementing a Short-time Fourier  
715 transform with a 500ms Hanning window with 10ms steps using the Fieldtrip functions `ft_freqanalysis` and  
716 `ft_connectivityanalysis` respectively. To determine statistical differences between granger spectrograms we  
717 created randomized trials by taking 400 random ripples per treatment and computing their time-frequency  
718 granger causality as described above. The result was stored, and the procedure was repeated 30 times to  
719 give a total of 30 randomized trials per treatment. We then used the trials of the rgs14 and control  
720 treatments to determine significant statistical difference in each pixel of the time-frequency matrix by

721 applying a nonparametric permutation test to correct for multiple comparisons with a two-tailed pixel-based  
722 correction, using 500 permutations and a p-value of 0.05.

## 723 **Neuronal activity analysis**

### 724 *Spike sorting*

725 An important step of our analysis was identifying the cortical neurons and their spiking activity. The  
726 sleep and trial recordings of each tetrode of the prelimbic cortex were extracted and concatenated  
727 chronologically to allow tracking the individual neuronal activity across the whole study day. The tetrode  
728 recordings were preprocessed by applying a bandpass filter between 300 and 3000 Hz. For each tetrode,  
729 multiple spike sorting algorithms were run using the SpikeInterface python-based framework<sup>38</sup>. The spike  
730 sorters used were Tridesclous, SpikingCircus, Klusta, HerdingSpikes, Ironclust, and MountainSort4. The  
731 default parameters included in SpikeInterface per spike sorter were used. Agreement between the spike  
732 sorters was computed and only putative neurons that were detected by at least two spike sorters were  
733 considered. When a tetrode didn't have any consensus, the detections of the MountainSort4 spike sorter  
734 were used given that this spike sorter had better scores according to the SpikeForest<sup>39</sup> metrics and our  
735 own examinations. After the putative neurons were detected, an experienced user curated manually the  
736 detections by visual inspection using the Phy interface and labeled them as either good, multiunit activity,  
737 or noise.

738

### 739 *Waveform extraction*

740 Sampled at 30 kHz, the prelimbic cortex tetrode channels were loaded and then filtered using a 3<sup>rd</sup>  
741 order Butterworth bandpass filter with a frequency range of 300-600 Hz. Neurons labelled as 'good' were  
742 used for further analysis. A preliminary waveform per neuron was defined with an 82-sample window with  
743 40 samples before and 41 samples after the spike timestamp (ST). For each neuron, STs were randomly  
744 permuted and a total of 2000 were selected. The permutation was done in order to avoid bias when  
745 selecting waveforms. These 2000 waveforms were averaged to obtain the mean spike waveform per  
746 neuron. Since tetrodes were used to record neuronal activity during the task and sleep, there were 4  
747 average waveforms to choose from. The one with the highest peak amplitude was chosen. For each neuron,  
748 all STs were stored. Further, each neuron was assigned a unique ID. This process was performed for all  
749 neurons of all rats.

750

### 751 *Neuron classification*

752 The average neuron waveforms calculated from rats 1, 2, 6 and 9 were categorized as 'Vehicle' and  
753 stored in a 139 (t1) × 82 matrix, with 139 being the total number of putative neurons and 82 being the  
754 number of samples as mentioned before. Similarly, 'RGS14' data from rats 3, 4, 7, 8 was stored as a 353  
755 (t2) × 82 matrix. Variables t1 and t2 were the total counts of neurons for the respective treatments. The  
756 bz\_CellClassification.m script from Buzsaki lab's GitHub was used to compute the trough-to-peak delay  
757 time and the spike width for the spike waveform of each putative neuron. The function  
758 ClusterPointsBoundaryOutBW.m of the same repository was modified to incorporate visualization of  
759 interneuron and pyramidal data for both treatments. Neurons were then visualized in a 2D plane with x and  
760 y axes as trough-to-peak delay and spike width respectively. The set of coordinates of all putative neurons  
761 were fed into a Gaussian Mixture Model (GMM) with two components in order to find the centroids of the  
762 clusters of pyramidal cells and interneurons. The cluster which contained spikes with high values of spike  
763 width and trough-to-peak delay was labelled as the pyramidal neurons cluster, while the remaining one was  
764 labelled as the interneurons cluster. For both clusters, a threshold of mean +/- 2 SD with respect to their  
765 centroids was used to filter out the outliers. Next, the firing rates of the remaining neurons were calculated  
766 as is described in the following paragraph and those with extreme firing rate values were reinspected in the  
767 Phy interface by another experimenter to potentially discard remaining false positives. After this procedure  
768 there were a total of 101 pyramidal neurons for the RGS14 treatment and 57 for Vehicle. The total number

769 of interneurons were 18 for RGS14 and 7 for Vehicle. In the following analyses, only pyramidal neurons  
770 were used given the low number of interneurons detected.

771

### 772 *Firing rate analysis*

773 The spikes of each neuron were grouped by the sleep stage during which they fired. The total number  
774 of spikes of a neuron during a specific sleep stage were determined by counting all the spikes occurring  
775 during the sleep stage in question across pre-trial sleep, post-trial sleep and trials periods of a single day.  
776 The cumulative amount of time spent in a specific sleep stage during the day was determined similarly.  
777 Using these two values, the firing rate of a neuron during a sleep stage was computed by dividing the total  
778 number of spikes during the sleep stage by the cumulative amount of time spent in seconds in the sleep  
779 stage. The firing rate during each sleep and wake stage was calculated for all neurons. The firing rates of  
780 neurons during the 'Wake' stage in the vehicle control condition were divided into 5 quantiles based on their  
781 magnitudes (0-20%, 20-40%, 40- 60%, 60-80%, 80-100%), as shown in **Figure 2G**. The upper-limit values  
782 of firing rate differentiating the groups in Vehicle were then used as a threshold to divide the neurons in the  
783 RGS treatments in 5 groups as well. The spike timestamps during NonREM sleep were collected across  
784 the whole study day for each neuron and the corresponding slow oscillation phases during each spike  
785 timestamps were extracted. The slow oscillation phase during spikes was calculated as described above  
786 for ripples and spindles.

787

### 788 *Cortical activity during ripples*

789 Using the spike timestamps during NonREM sleep, the cortical pyramidal neuron response to  
790 hippocampal ripples was computed in a 2 second window defined around the peak of each ripple. For each  
791 ripple the activity of all pyramidal neurons detected during that day was extracted. The spikes timestamps  
792 in the 2 second window were normalized to vary from -1 to 1 seconds, where 0 was the ripple peak. After  
793 concatenating the normalized timestamps across all ripple-centered windows per neuron, they were binned  
794 in 10 ms bins and the number of spikes was determined for each bin. Hence, for each neuron, a [1 x 200]  
795 column vector was obtained. This vector was then z-normalized. The final z-scored vector was found by  
796 averaging the z-scored vector over all neurons. The data was smoothed twice using the MATLAB smooth  
797 function. To visualize the activity of prelimbic cortex pyramidal neurons around the ripple, the firing activity  
798 of a neuron was determined from a 50 ms window around the peak of the ripple (-20 to +30 ms) by  
799 quantifying the number of spikes. After compiling the firing activity around the ripple peak for each neuron  
800 the values were sorted in an ascending order and was visualized using the MATLAB imagesc function.

801

### 802 *Figures*

803 Figures were generated in GraphPad Prism (truncated violin plots with high smoothing).

804



805 **Acknowledgments:** We would like to thank Pelin Özsezer, Barbora Roldanus and  
806 Kopal Agarwal for data analysis, Mònica Siuraneta, Vera Mascarenhas Pombeiro  
807 Duarte Silva, Jay Chen, Alysha Maurmair, Jet van der Stoep, Joris van Hout, Koen van  
808 den Berg and Rian Kraan for performing behavioral experiments.

809

810 **Funding:**

811 Branco Weiss Fellowship – Society in Science (LG), VIDI NWO (LG), Fundación  
812 Alfonso Martín Escudero Fellowship (INL)

813

814 **Author contributions:** Conceptualization: LG, INL, Methodology: LG, INL, ZK, MK,  
815 Investigation: INL, MK, AS, JvdM, AIA, Data analysis: AAZ, AR, MK, MB, SN, Funding  
816 acquisition: LG, INL, Writing – original draft: LG, Writing – review & editing: INL, MK, ZK

817

818 **Competing interests:** Authors declare that they have no competing interests.

819

820 **Data and materials availability:** All data is available on the Donders Repository, code  
821 on GitHub (see materials and methods for links)

822

823  
824  
825  
826  
827  
828  
829  
830  
831

## Increasing cortical plasticity leads to memory interference and enhanced hippocampal-cortical interactions - Supplementary Materials

Irene Navarro-Lobato<sup>1\*</sup>, Adrian Aleman-Zapata<sup>1</sup>, Anumita Samanta<sup>1</sup>, Milan Bogers<sup>1</sup>, Shekhar Narayanan<sup>1</sup>, Abdelrahman Rayan<sup>1</sup>, Alejandra Alonso<sup>1</sup>, Jacqueline van der Meij<sup>1</sup>, Mehdi Khamassi<sup>2</sup>, Zafar Khan<sup>3</sup>, Lisa Genzel<sup>1\*</sup>

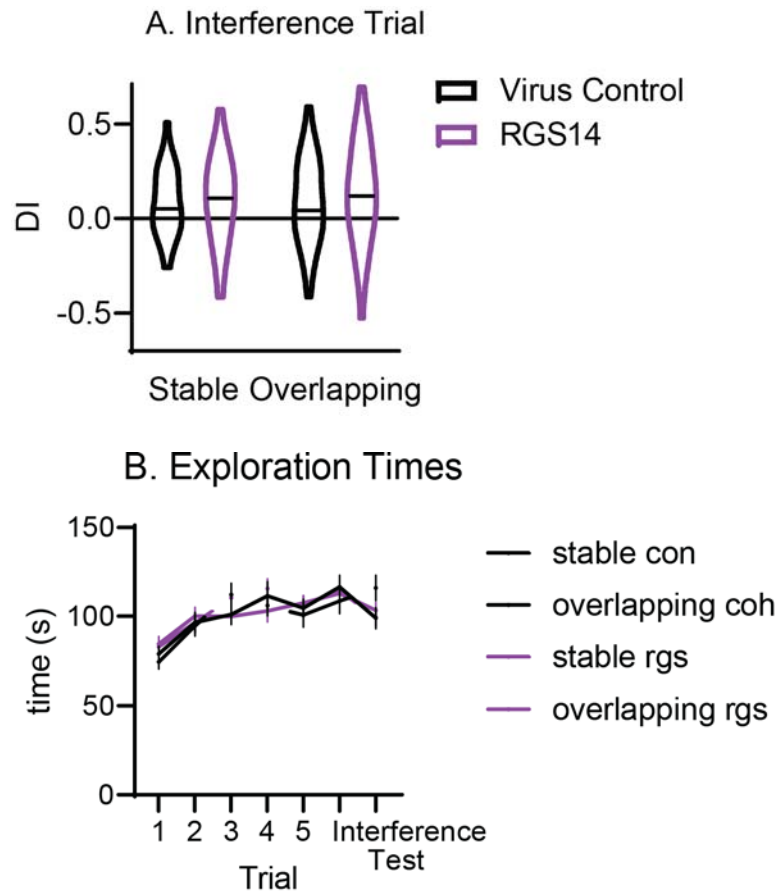

832  
833

Fig.S1: A. Discrimination Index for the interference trial. B. Exploration times for all trials and conditions

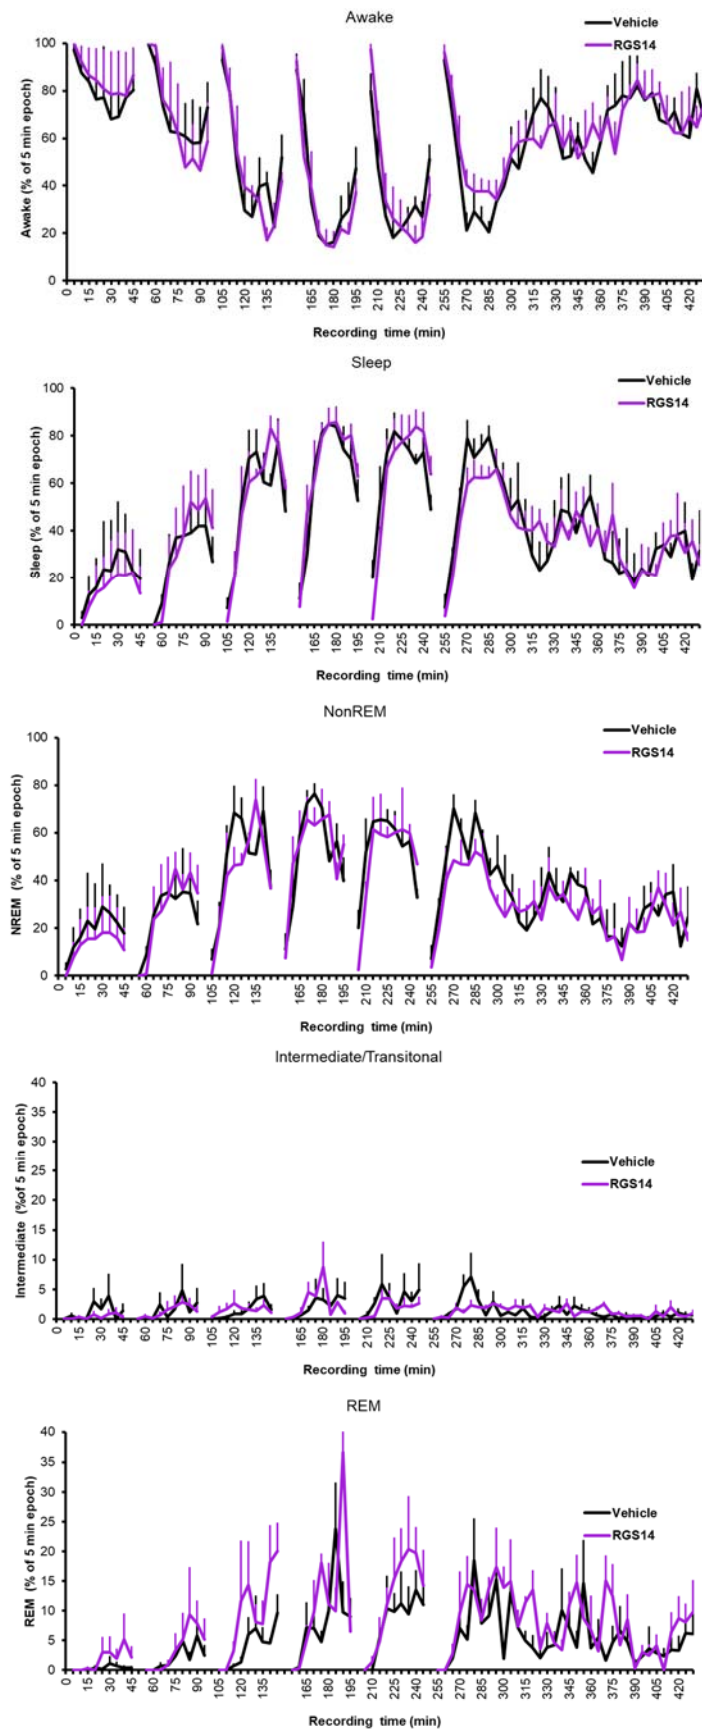

Fig. S2: Wake and sleep states for each 5 min bin the sleep recording box. Averaged across conditions, SEM calculated with  $n$ =animal



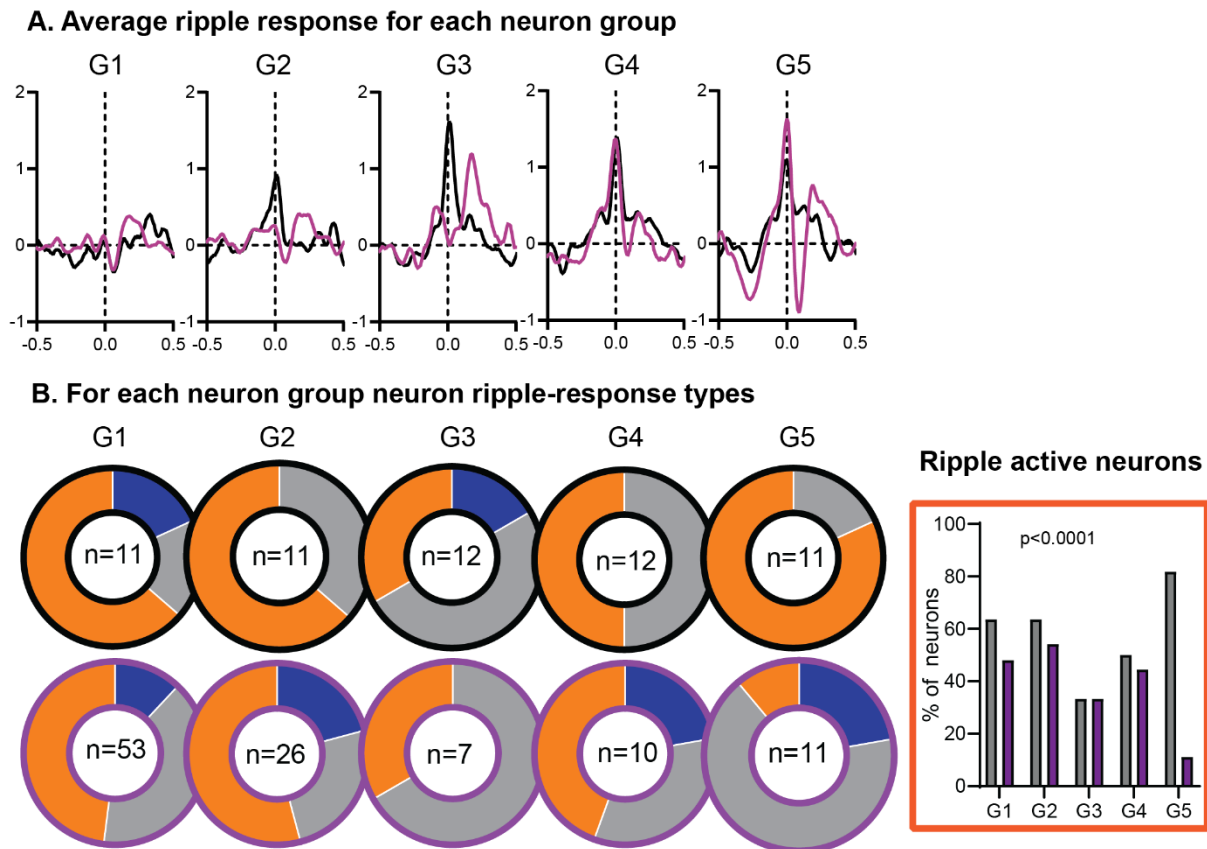

844  
845  
846  
847  
848  
849

Fig. S4: A. Average neuronal firing (z-normalized activity) with 0 time of ripple, split for firing-rate neuron groups. B. Classification into ripple-suppressed (blue), ripple-neutral (grey) and ripple-active (orange) neurons per firing rate group. On the right ripple active neurons per neuron group. There was a significant effect where in RGS there are less G5 neurons that are ripple active.

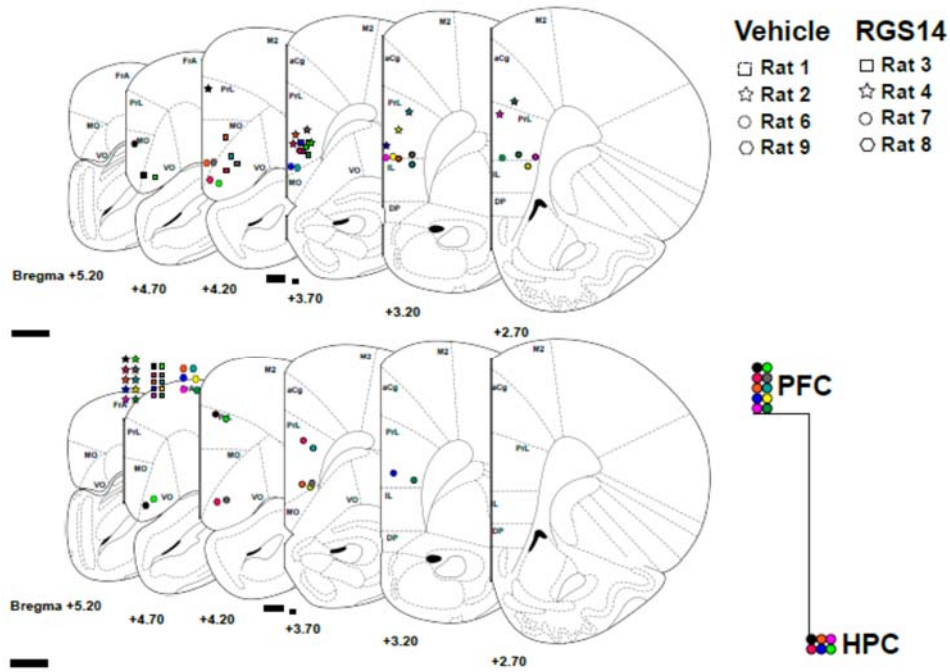

850  
851  
852

Fig. S5: Placement of tetrodes per rat and brain area.

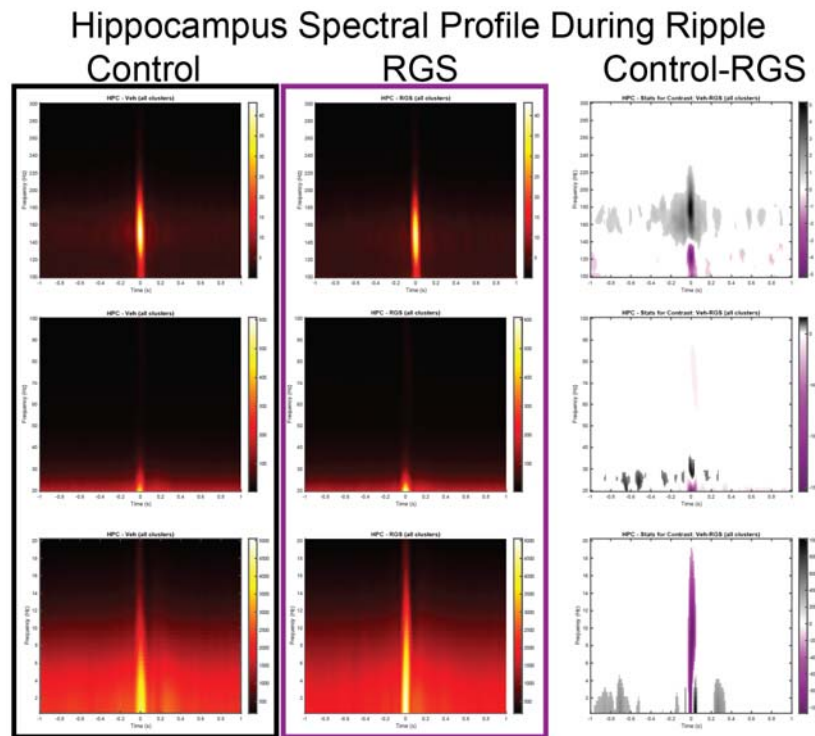

Fig. S6 Hippocampal (top) and prelimbic (bottom) spectral profile around ripple events for control animals (black) and RGS14 (purple) and the contrast (pixel-based correction for multiple comparison). Purple RGS14 higher, grey Control higher. From top to bottom windows 100-300Hz, 20-100 Hz and 0-20Hz.

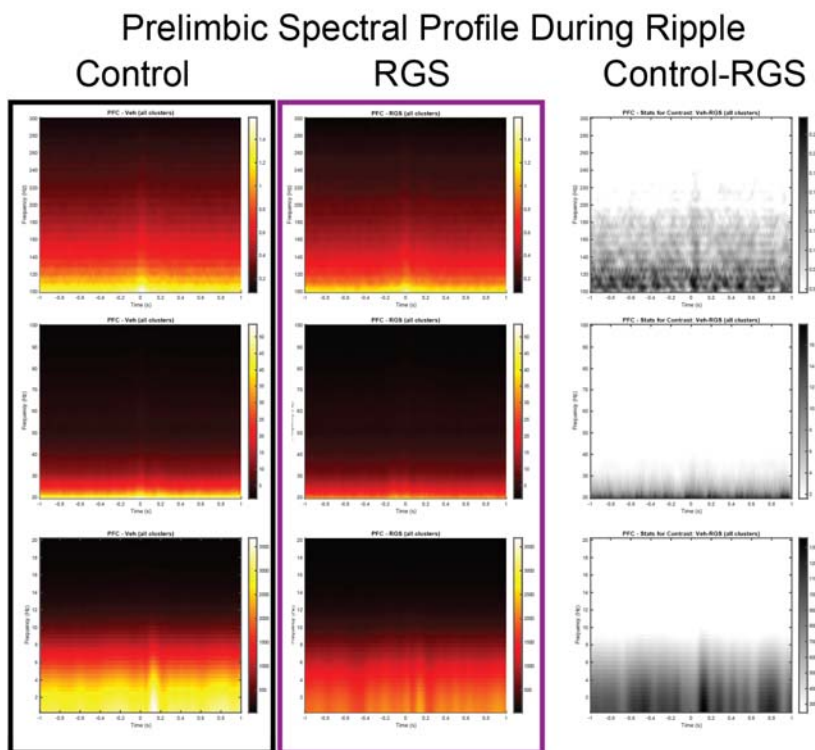

### Hippocampus to Prelimbic Granger During Ripple

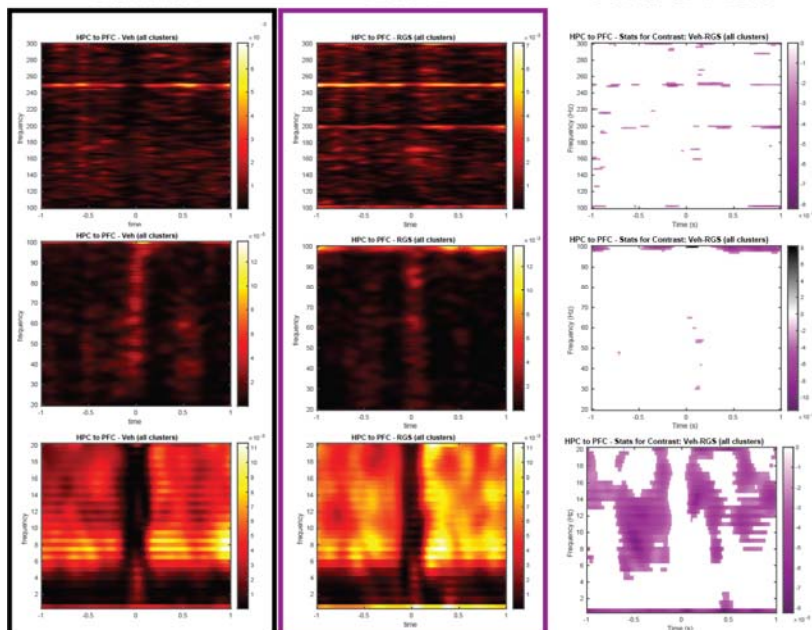

Fig. S7 Hippocampal to prelimbic (top) and prelimbic to hippocampus (bottom) granger time frequency analysis around ripple events for control animals (black) and RGS14 (purple) and the contrast (pixel-based correction for multiple comparison). Purple RGS14 higher, grey Control higher. From top to bottom windows 100-300Hz, 20-100 Hz and 0-20Hz.

### Prelimbic to Hippocampus Granger Profile During Ripple

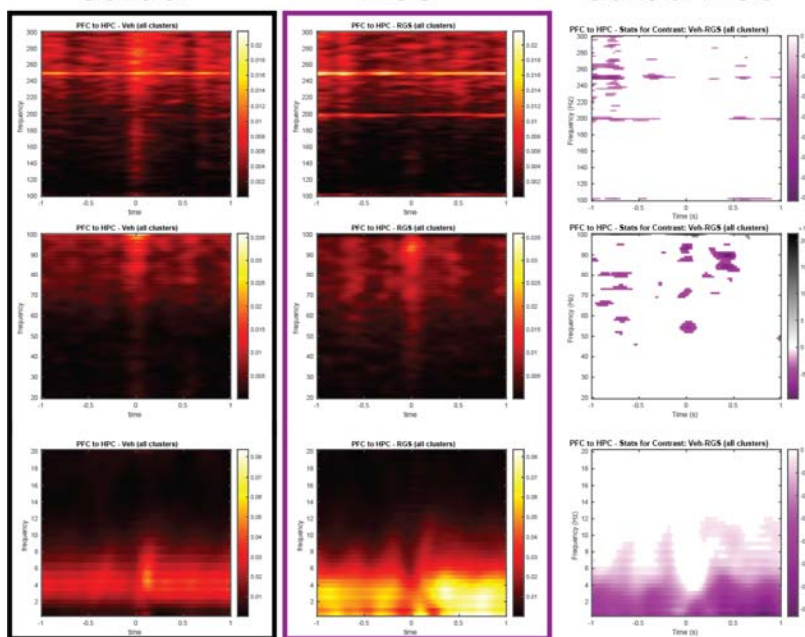



878

- 879 1 Scoville, W. & Milner, B. Loss of recent memory after bilateral hippocampal lesions. *J*  
880 *Neurol Neurosurg Psychiat* **20**, 11-23 (1957).
- 881 2 Marr, D. A theory for cerebral neocortex. *Proc R Soc Lond B Biol Sci* **176**, 161-234  
882 (1970).
- 883 3 McClelland, J. L., McNaughton, B. L. & O'Reilly, R. C. Why there are complementary  
884 learning systems in the hippocampus and neocortex: insights from the successes and  
885 failures of connectionist models of learning and memory. *Psychol Rev* **102**, 419-457  
886 (1995).
- 887 4 Marr, D. Simple memory: a theory for archicortex. *Philos Trans R Soc Lond B Biol Sci*  
888 **262**, 23-81 (1971).
- 889 5 Navarro-Lobato, I. *et al.* 14-3-3 $\zeta$  is crucial for the conversion of labile short-term object  
890 recognition memory into stable long-term memory. *Journal of neuroscience research* **99**,  
891 2305-2317, doi:10.1002/jnr.24894 (2021).
- 892 6 Masmudi-Martín, M. *et al.* RGS14(414) treatment induces memory enhancement and  
893 rescues episodic memory deficits. *Faseb j* **33**, 11804-11820,  
894 doi:10.1096/fj.201900429RR (2019).
- 895 7 Navarro-Lobato, I. *et al.* RGS14414-Mediated Activation of the 14-3-3 $\zeta$  in Rodent  
896 Perirhinal Cortex Induces Dendritic Arborization, an Increase in Spine Number, Long-  
897 Lasting Memory Enhancement, and the Prevention of Memory Deficits. *Cerebral Cortex*  
898 **32**, 1894-1910, doi:10.1093/cercor/bhab322 (2021).
- 899 8 Masmudi-Martín, M. *et al.* Reversal of Object Recognition Memory Deficit in Perirhinal  
900 Cortex-Lesioned Rats and Primates and in Rodent Models of Aging and Alzheimer's  
901 Diseases. *Neuroscience* **448**, 287-298,  
902 doi:<https://doi.org/10.1016/j.neuroscience.2020.08.039> (2020).
- 903 9 López-Aranda, M. F. *et al.* Role of Layer 6 of V2 Visual Cortex in Object-Recognition  
904 Memory. *Science* **325**, 87-89, doi:doi:10.1126/science.1170869 (2009).
- 905 10 Genzel, L. *et al.* The object space task shows cumulative memory expression in both  
906 mice and rats. *PLoS Biol* **17** (2019).
- 907 11 Tononi, G. & Cirelli, C. Sleep and the Price of Plasticity: From Synaptic and Cellular  
908 Homeostasis to Memory Consolidation and Integration. *Neuron* **81**, 12-34 (2014).
- 909 12 Tononi, G. & Cirelli, C. Sleep function and synaptic homeostasis. *Sleep Medicine*  
910 *Reviews* **10**, 49-62, doi:10.1016/j.smrv.2005.05.002 (2006).
- 911 13 Huber, R., Ghilardi, M. F., Massimini, M. & Tononi, G. Local sleep and learning. *Nature*  
912 **430**, 78-81 (2004).
- 913 14 Grosmark, A. D. & Buzsaki, G. Diversity in neural firing dynamics supports both rigid  
914 and learned hippocampal sequences. *Science* **351**, 1440-1443 (2016).
- 915 15 Buzsaki, G. Two-stage model of memory trace formation: A role for "noisy" brain states.  
916 *Neuroscience* **31**, 551-570 (1989).
- 917 16 Benchenane, K. *et al.* Coherent theta oscillations and reorganization of spike timing in  
918 the hippocampal- prefrontal network upon learning. *Neuron* **66**, 921-936,  
919 doi:10.1016/j.neuron.2010.05.013 (2010).
- 920 17 Genzel, L., Kroes, M. C. W., Dresler, M. & Battaglia, F. P. Light sleep versus slow wave  
921 sleep in memory consolidation: a question of global versus local processes? *Trends in*  
922 *Neurosciences* **37**, 10-19 (2014).
- 923 18 Molle, M., Marshall, L., Gais, S. & Born, J. Grouping of spindle activity during slow  
924 oscillations in human non-rapid eye movement sleep. *The Journal of neuroscience : the*  
925 *official journal of the Society for Neuroscience* **22**, 10941-10947 (2002).

- 926 19 Peyrache, A., Khamassi, M., Benchenane, K., Wiener, S. I. & Battaglia, F. P. Replay of  
927 rule-learning related neural patterns in the prefrontal cortex during sleep. *Nat Neurosci*  
928 **12**, 919-926 (2009).
- 929 20 Maingret, N., Girardeau, G., Toderova, R., Goutiere, M. & Zugaro, M. Hippocampo-  
930 cortical coupling mediates memory consolidation during sleep. *Nature Neuroscience* **19**,  
931 959-964, doi:10.1038/nn.4304 (2016).
- 932 21 Sirota, A., Csicsvari, J., Buhl, D. & Buzsáki, G. r. Communication between neocortex  
933 and hippocampus during sleep in rodents. *Proceedings of the National Academy of*  
934 *Sciences* **100**, 2065-2069 (2003).
- 935 22 Diekelmann, S. & Born, J. The memory function of sleep. *Nat Rev Neurosci* **11**, 114-126  
936 (2010).
- 937 23 Buzsáki, G. Hippocampal sharp wave-ripple: A cognitive biomarker for episodic memory  
938 and planning. *Hippocampus* **25**, 1073-1188, doi:10.1002/hipo.22488 (2015).
- 939 24 Girardeau, G., Benchenane, K., Wiener, S. I., Buzsáki, G. & Zugaro, M. B. Selective  
940 suppression of hippocampal ripples impairs spatial memory. *Nat Neurosci* **12**, 1222-1223  
941 (2009).
- 942 25 Wierzynski, C. M., Lubenov, E. V., Gu, M. & Siapas, A. G. State-dependent spike-timing  
943 relationships between hippocampal and prefrontal circuits during sleep. *Neuron* **61**, 587-  
944 596, doi:10.1016/j.neuron.2009.01.011 (2009).
- 945 26 Rothschild, G., Eban, E. & Frank, L. M. A cortical-hippocampal-cortical loop of  
946 information processing during memory consolidation. *Nat Neurosci* **20**, 251-259 (2017).
- 947 27 Wang, D. V. & Ikemoto, S. Coordinated Interaction between Hippocampal Sharp-Wave  
948 Ripples and Anterior Cingulate Unit Activity. *The Journal of neuroscience : the official*  
949 *journal of the Society for Neuroscience* **36**, 10663-10672,  
950 doi:10.1523/JNEUROSCI.1042-16.2016 (2016).
- 951 28 Lopez-Aranda, M. F. *et al.* Role of layer 6 of V2 visual cortex in object-recognition  
952 memory. *Science* **325**, 87-89, doi:10.1126/science.1170869 (2009).
- 953 29 Masmudi-Martin, M. *et al.* RGS14414 treatment induces memory enhancement and  
954 rescues episodic memory deficits. *FASEB J* **33**, 11804-11820,  
955 doi:10.1096/fj.201900429RR (2019).
- 956 30 Brunetti, P. M. *et al.* Design and fabrication of ultralight weight, adjustable multi-  
957 electrode probes for electrophysiological recordings in mice. *J Vis Exp*, e51675,  
958 doi:10.3791/51675 (2014).
- 959 31 Kloosterman, F. *et al.* Micro-drive array for chronic in vivo recording: drive fabrication.  
960 *J Vis Exp*, doi:10.3791/1094 (2009).
- 961 32 Nguyen, D. P. *et al.* Micro-drive array for chronic in vivo recording: tetrode assembly. *J*  
962 *Vis Exp*, doi:10.3791/1098 (2009).
- 963 33 Paxinos, G. W., Charles. *The Rat Brain Atlas in Stereotaxic Coordinates*. 7th Edition edn,  
964 (Academic Press, 2013).
- 965 34 Genzel, L. *et al.* The object space task shows cumulative memory expression in both  
966 mice and rats. *PLoS Biol* **17**, e3000322, doi:10.1371/journal.pbio.3000322 (2019).
- 967 35 Oostenveld, R., Fries, P., Maris, E. & Schoffelen, J. M. FieldTrip: Open source software  
968 for advanced analysis of MEG, EEG, and invasive electrophysiological data. *Comput*  
969 *Intell Neurosci* **2011**, 156869, doi:10.1155/2011/156869 (2011).
- 970 36 Maris, E. & Oostenveld, R. Nonparametric statistical testing of EEG- and MEG-data.  
971 *Journal of Neuroscience Methods* **164**, 177-190,  
972 doi:<https://doi.org/10.1016/j.jneumeth.2007.03.024> (2007).

- 973 37 Dhamala, M., Rangarajan, G. & Ding, M. Analyzing information flow in brain networks  
974 with nonparametric Granger causality. *NeuroImage* **41**, 354-362,  
975 doi:<https://doi.org/10.1016/j.neuroimage.2008.02.020> (2008).
- 976 38 Buccino, A. P. *et al.* SpikeInterface, a unified framework for spike sorting. *eLife* **9**,  
977 e61834, doi:10.7554/eLife.61834 (2020).
- 978 39 Magland, J. *et al.* SpikeForest, reproducible web-facing ground-truth validation of  
979 automated neural spike sorters. *eLife* **9**, e55167, doi:10.7554/eLife.55167 (2020).  
980
- 981
- 982
